# Supplementary material for: Mining Candidate Genes and Favorable Haplotypes for Flag Leaf Shape in Rice (Oryza sativa L.) Based on a Genome-Wide Association Study
Source: MDPI journal article supplement (doi:10.3390/agronomy12081814), 2022-07-30
Supplement: s1 [file s1]

## Tables

**Table S1.** Names and origins of 173 rice accessions used for association mapping.

| Code | Germplasm name   | Origin                       | Latitude | Longitude | Germplasm ID <sup>a</sup>    | Subpopulation | region |
|------|------------------|------------------------------|----------|-----------|------------------------------|---------------|--------|
| 1    | Longjing 22      | Haerbin, Heilongjiang, China | 44.04    | 125.42    | <a href="#">HS2008010</a>    | Japonica      | NEC    |
| 2    | Longjing 28      | Haerbin, Heilongjiang, China | 44.04    | 125.42    | <a href="#">HS2009011</a>    | Japonica      | NEC    |
| 3    | Longjing 27      | Haerbin, Heilongjiang, China | 44.04    | 125.42    | <a href="#">HS2009010</a>    | Japonica      | NEC    |
| 4    | 24248            | Nanjing, Jiangsu, China      | 32.04    | 118.78    |                              | Japonica      | EC     |
| 5    | Tijin            | Japan                        | 35.68    | 139.69    | <a href="#">H1706</a>        | Japonica      | JP     |
| 6    | Zhongguo 91      | Japan                        | 35.68    | 139.69    | <a href="#">NL274</a>        | Japonica      | JP     |
| 7    | Kangbingyueguang | Japan                        | 35.68    | 139.69    | <a href="#">H1524</a>        | Japonica      | JP     |
| 8    | Sihao 4385       | Sihong, Jiangsu, China       | 33.46    | 118.23    | <a href="#">H1315</a>        | Japonica      | EC     |
| 9    | Nannongjing 1R   | Nanjing, Jiangsu, China      | 32.04    | 118.78    | <a href="#">H1372</a>        | Japonica      | EC     |
| 10   | Hongmangshajing  | Kunshan, Jiangsu, China      | 31.39    | 120.95    | <a href="#">T630</a>         | Indica        | EC     |
| 11   | Wanhuangdao      | Wuxian, Jiangsu, China       | 31.32    | 120.62    | <a href="#">T815</a>         | Japonica      | EC     |
| 12   | Xudao 3hao       | Haerbin, Heilongjiang, China | 34.26    | 117.2     | <a href="#">SS200306</a>     | Japonica      | NEC    |
| 13   | Youzhiyueguang   | Japan                        | 35.68    | 139.69    | <a href="#">Y1A01876</a>     | Japonica      | JP     |
| 14   | Yuedao 68        | Vietnam                      | 10.22    | 106.01    | <a href="#">Y1A02418</a>     | Indica        | SEA    |
| 15   | Longdao 8hao     | Haerbin, Heilongjiang, China | 44.04    | 125.42    | <a href="#">HS2008019</a>    | Japonica      | NEC    |
| 16   | Longdao 6hao     | Haerbin, Heilongjiang, China | 44.04    | 125.42    | <a href="#">HS2006004</a>    | Japonica      | NEC    |
| 17   | Qiutianxiaoding  | Japan                        | 35.68    | 139.69    | <a href="#">H1654</a>        | Japonica      | JP     |
| 18   | Zhenghan 2hao    | Zhengzhou, Henan, China      | 34.76    | 113.65    | <a href="#">GS2003031</a>    | Japonica      | CC     |
| 19   | Xiangjing 9407   | Nanjing, Jiangsu, China      | 32.04    | 118.78    | <a href="#">LS891061</a>     | Japonica      | EC     |
| 20   | Nongxiang 21     | Changsha, Hunan, China       | 28.21    | 113       | <a href="#">CNA200802496</a> | Indica        | CC     |
| 21   | Fengyouwan 8hao  | Changsha, Hunan, China       | 28.21    | 113       | <a href="#">YS2009001</a>    | Indica        | CC     |

|    |                   |                                 |       |        |                           |          |     |
|----|-------------------|---------------------------------|-------|--------|---------------------------|----------|-----|
| 22 | Xiangwanxian 17   | Changsha, Hunan, China          | 28.21 | 113    | <a href="#">XS2008035</a> | Indica   | CC  |
| 23 | Yuedao 37         | Vietnam                         | 10.22 | 106.01 | <a href="#">Y1A02397</a>  | Indica   | SEA |
| 24 | Sujing 353        | Suzhou, Jiangsu, China          | 31.32 | 120.62 | <a href="#">C1511</a>     | Japonica | EC  |
| 25 | Zhen9424          | Zhenjiang, Jiangsu, China       | 32.12 | 119.27 | <a href="#">ZD-05658</a>  | Japonica | EC  |
| 26 | Baikenuo          | Wujiang, Jiangsu, China         | 31.16 | 120.63 | <a href="#">T354</a>      | Indica   | EC  |
| 27 | Diantun502xuanzao | Kunming, Yunnan, China          | 25.04 | 102.73 | <a href="#">ZD-05551</a>  | Indica   | SWC |
| 28 | Yuedao 41         | Vietnam                         | 10.22 | 106.01 | <a href="#">Y1A02328</a>  | Indica   | SEA |
| 29 | Longnuo 3hao      | Haerbin, Heilongjiang, China    | 44.04 | 125.42 | <a href="#">HS2009015</a> | Japonica | NEC |
| 30 | Mudanjiang 28     | Mudanjiang, Heilongjiang, China | 44.58 | 129.6  | <a href="#">HS2006006</a> | Japonica | NEC |
| 31 | Yujing 6hao       | Zhengzhou, Henan, China         | 34.76 | 113.65 | <a href="#">GS980002</a>  | Japonica | CC  |
| 32 | Shengdao808       | Haerbin, Heilongjiang, China    | 44.04 | 125.42 |                           | Japonica | NEC |
| 33 | Yuedao 32         | Vietnam                         | 10.22 | 106.01 | <a href="#">Y1A02326</a>  | Indica   | SEA |
| 34 | Yuedao 107        | Vietnam                         | 10.22 | 106.01 | <a href="#">Y1A02368</a>  | Indica   | SEA |
| 35 | Yuedao 61         | Vietnam                         | 10.22 | 106.01 | <a href="#">Y1A02413</a>  | Indica   | SEA |
| 36 | Yuedao 50         | Vietnam                         | 10.22 | 106.01 | <a href="#">Y1A02331</a>  | Indica   | SEA |
| 34 | Yuedao 109        | Vietnam                         | 10.22 | 106.01 | <a href="#">Y1A02356</a>  | Indica   | SEA |
| 38 | Yuedao 62         | Vietnam                         | 10.22 | 106.01 | <a href="#">Y1A02414</a>  | Indica   | SEA |
| 39 | Yuedao 66         | Vietnam                         | 10.22 | 106.01 | <a href="#">Y1A02417</a>  | Indica   | SEA |
| 40 | Hongnong 5hao     | Wujiang, Jiangsu, China         | 31.16 | 120.63 | <a href="#">T757</a>      | Japonica | EC  |
| 41 | Suyunuo           | xuzhou, Jiangsu, China          | 34.26 | 117.2  | <a href="#">T832</a>      | Japonica | EC  |
| 42 | Shenlenuo         | Kunshan, Jiangsu, China         | 31.39 | 120.95 | <a href="#">T691</a>      | Japonica | EC  |
| 43 | Hongjiaozhan      | Wuxian, Jiangsu, China          | 31.32 | 120.62 | <a href="#">T888</a>      | Indica   | EC  |
| 44 | Wanjingnuo        | Hefei, Anhui, China             | 31.86 | 117.27 | <a href="#">H1653</a>     | Japonica | EC  |
| 45 | Nongxiang26       | Changsha, Hunan, China          | 28.21 | 113    |                           | Indica   | CC  |
| 46 | Yuedao 9          | Vietnam                         | 10.22 | 106.01 | <a href="#">Y1A02373</a>  | Indica   | SEA |
| 47 | M1004             | Japan                           | 35.68 | 139.69 | <a href="#">Y1A01861</a>  | Japonica | JP  |

|    |                       |                                   |       |        |                            |          |     |
|----|-----------------------|-----------------------------------|-------|--------|----------------------------|----------|-----|
| 48 | Nongxiang 25          | Changsha, Hunan, China            | 28.21 | 113    | <a href="#">GS2001021</a>  | Indica   | CC  |
| 49 | Longjing 20           | Haerbin, Heilongjiang, China      | 44.04 | 125.42 | <a href="#">HS2007004</a>  | Japonica | NEC |
| 50 | Xiangchuanwuxinbaimi  | Japan                             | 35.68 | 139.69 | <a href="#">H1655</a>      | Japonica | JP  |
| 51 | Jindao 1007           | Dongli, Tianjin, China            | 39.14 | 117.13 | <a href="#">GS2004043</a>  | Japonica | EC  |
| 52 | Zaijinjing            | Songhuajiang, Heilongjiang, China | 41.42 | 119.52 | <a href="#">H1614</a>      | Japonica | NEC |
| 53 | Malaihong             | Nanjing, Jiangsu, China           | 32.04 | 118.78 | <a href="#">T050</a>       | Japonica | EC  |
| 54 | Nannongjing3786       | Haerbin, Heilongjiang, China      | 44.04 | 125.42 |                            | Japonica | NEC |
| 55 | Wuyunjing 8hao        | Wujin, Jiangsu, China             | 31.78 | 119.95 | <a href="#">SZS313</a>     | Japonica | EC  |
| 56 | Yuzhenxiang           | Changsha, Hunan, China            | 28.21 | 113    | <a href="#">XS2009038</a>  | Indica   | CC  |
| 57 | Yuedao24(LCV18)       | Vietnam                           | 10.22 | 106.01 |                            | Indica   | SEA |
| 58 | Yuedao 3              | Vietnam                           | 10.22 | 106.01 | <a href="#">Y1A02370</a>   | Indica   | SEA |
| 59 | Yuedao 43             | Vietnam                           | 10.22 | 106.01 | <a href="#">Y1A02404</a>   | Indica   | SEA |
| 60 | Yuedao 48             | Vietnam                           | 10.22 | 106.01 | <a href="#">Y1A02407</a>   | Indica   | SEA |
| 61 | Yuedao 49             | Vietnam                           | 10.22 | 106.01 | <a href="#">Y1A02408</a>   | Indica   | SEA |
| 62 | Yuedao 13             | Vietnam                           | 10.22 | 106.01 | <a href="#">Y1A02320</a>   | Indica   | SEA |
| 63 | Wumangyedao           | Jinshan, Shanghai, China          | 30.75 | 121.33 | <a href="#">T335</a>       | Japonica | EC  |
| 64 | Haobuqia              | Wuxian, Jiangsu, China            | 31.32 | 120.62 | <a href="#">21-00357</a>   | Indica   | EC  |
| 65 | Yuedao 22             | Vietnam                           | 10.22 | 106.01 | <a href="#">Y1A02382</a>   | Indica   | SEA |
| 66 | Dongzhengwuyunjing 21 | Hongze, Jiangsu, China            | 33.28 | 118.85 | <a href="#">SS200705-1</a> | Japonica | EC  |
| 67 | Yandao 8hao           | Yancheng, Jiangsu, China          | 33.38 | 120.13 | <a href="#">SS200307</a>   | Japonica | EC  |
| 68 | Huaidao 11hao         | Huaian, Jiangsu, China            | 33.5  | 119.15 | <a href="#">SS200805</a>   | Japonica | EC  |
| 69 | Nannongjing 004       | Nanjing, Jiangsu, China           | 32.04 | 118.78 | <a href="#">T248</a>       | Japonica | EC  |
| 70 | Zhongzuo 93           | Mudanjiang, Heilongjiang, China   | 44.6  | 129.58 | <a href="#">JS1995001</a>  | Japonica | NEC |
| 71 | Xudao 5hao            | Xuzhou, Jiangsu, China            | 34.15 | 117.11 | <a href="#">GS2006059</a>  | Japonica | EC  |

|    |                 |                              |       |        |                               |          |     |
|----|-----------------|------------------------------|-------|--------|-------------------------------|----------|-----|
| 72 | Digludao        | Sihong, Jiangsu, China       | 33.46 | 118.23 | <a href="#">H1312</a>         | Japonica | EC  |
| 73 | Huaidao 8hao    | Huaian, Jiangsu, China       | 33.5  | 119.15 | <a href="#">SS200410</a>      | Japonica | EC  |
| 74 | Dongzheng 1640  | Hongze, Jiangsu, China       | 33.28 | 118.85 | <a href="#">C1515</a>         | Japonica | EC  |
| 75 | Yanjing 8hao    | Yancheng, Jiangsu, China     | 33.38 | 120.13 | <a href="#">ZD-05649</a>      | Japonica | EC  |
| 76 | Huifeng 2       | Yancheng, Jiangsu, China     | 33.38 | 120.13 | <a href="#">C1509</a>         | Japonica | EC  |
| 77 | Yandao 9hao     | Yancheng, Jiangsu, China     | 33.38 | 120.13 | <a href="#">SS200506</a>      | Japonica | EC  |
| 78 | Lianjing 4hao   | Lianyungang, Jiangsu, China  | 34.59 | 119.16 | <a href="#">SS200704</a>      | Japonica | EC  |
| 79 | Huifeng 1       | Yancheng, Jiangsu, China     | 33.38 | 120.13 | <a href="#">C1508</a>         | Japonica | EC  |
| 80 | Sihao 4280      | Sihong, Jiangsu, China       | 33.46 | 118.23 | <a href="#">H1705</a>         | Japonica | EC  |
| 81 | Sihao 4330      | Sihong, Jiangsu, China       | 33.46 | 118.23 | <a href="#">H1704</a>         | Japonica | EC  |
| 82 | Sihao 4259      | Sihong, Jiangsu, China       | 33.46 | 118.23 | <a href="#">H1334</a>         | Japonica | EC  |
| 83 | Zhengdao 18     | Zhengzhou, Henan, China      | 34.76 | 113.65 | <a href="#">GS2007033</a>     | Japonica | CC  |
| 84 | Jingnuo 330     | Hefei, Anhui, China          | 31.86 | 117.27 | <a href="#">H1346</a>         | Japonica | EC  |
| 85 | Zhongjing 212   | Nanjing, Jiangsu, China      | 32.04 | 118.78 | <a href="#">WS891061</a>      | Japonica | EC  |
| 86 | Wuyunjing 21hao | Wujin, Jiangsu, China        | 31.78 | 119.95 | <a href="#">SS200705-2</a>    | Japonica | EC  |
| 87 | Huajing 6hao    | Huaian, Jiangsu, China       | 33.5  | 119.15 | <a href="#">SS200706</a>      | Japonica | EC  |
| 88 | Yangfujing 8hao | Yancheng, Jiangsu, China     | 33.38 | 120.13 | <a href="#">SS200608</a>      | Japonica | EC  |
| 89 | Zhendao 99      | Zhenjiang, Jiangsu, China    | 32.12 | 119.27 | <a href="#">SS200106</a>      | Japonica | EC  |
| 90 | Ningjing 2hao   | Nanjing, Jiangsu, China      | 32.04 | 118.78 | <a href="#">WPS05010476</a>   | Japonica | EC  |
| 91 | Huajing 5hao    | Huaian, Jiangsu, China       | 33.5  | 119.15 | <a href="#">SS200505</a>      | Japonica | EC  |
| 92 | Zhongjing 9677  | Nanjing, Jiangsu, China      | 32.04 | 118.78 | <a href="#">C1512</a>         | Japonica | EC  |
| 93 | Yangfujing 7hao | Yangzhou, Jiangsu, China     | 32.24 | 119.26 | <a href="#">SS200413</a>      | Japonica | EC  |
| 94 | Yuedao 12       | Vietnam                      | 10.22 | 106.01 | <a href="#">Y1A02375</a>      | Indica   | SEA |
| 95 | Jianongnuo 2hao | Haerbin, Heilongjiang, China | 44.04 | 125.42 | <a href="#">H1600</a>         | Japonica | NEC |
| 96 | Xudao 4hao      | Xuzhou, Jiangsu, China       | 34.15 | 117.11 | <a href="#">CNA20040007.X</a> | Japonica | EC  |
| 97 | Sihao 4040      | Sihong, Jiangsu, China       | 33.46 | 118.23 | <a href="#">H1703</a>         | Japonica | EC  |

|     |                  |                              |       |        |                             |          |     |
|-----|------------------|------------------------------|-------|--------|-----------------------------|----------|-----|
| 98  | Yanjing 9hao     | Yancheng, Jiangsu, China     | 33.38 | 120.13 | <a href="#">SS200707</a>    | Japonica | EC  |
| 99  | Sihao 4081       | Sihong, Jiangsu, China       | 33.46 | 118.23 | <a href="#">H1337</a>       | Japonica | EC  |
| 100 | Sihao 4041       | Sihong, Jiangsu, China       | 33.46 | 118.23 | <a href="#">H1338</a>       | Japonica | EC  |
| 101 | Sihao 4031       | Sihong, Jiangsu, China       | 33.46 | 118.23 | <a href="#">H1340</a>       | Japonica | EC  |
| 102 | Wandao 68        | Hefei, Anhui, China          | 31.86 | 117.27 | <a href="#">WPS03010384</a> | Japonica | EC  |
| 103 | Wuxiang99-8      | Suihua, Heilongjiang, China  | 46.63 | 126.98 |                             | Japonica | NEC |
| 104 | Zhongjing 131    | Haerbin, Heilongjiang, China | 44.04 | 125.42 | <a href="#">H1620</a>       | Japonica | NEC |
| 105 | Ningjinghui 260  | Nanjing, Jiangsu, China      | 32.04 | 118.78 | <a href="#">H1371</a>       | Japonica | EC  |
| 106 | Ningjinghui 237  | Nanjing, Jiangsu, China      | 32.04 | 118.78 | <a href="#">H1374</a>       | Japonica | EC  |
| 107 | Wunuoyihao       | Haerbin, Heilongjiang, China | 44.04 | 125.42 | <a href="#">H1611</a>       | Japonica | NEC |
| 108 | Sihao 4029       | Sihong, Jiangsu, China       | 33.46 | 118.23 | <a href="#">H1333</a>       | Japonica | EC  |
| 109 | Ludao            | Nanjing, Jiangsu, China      | 32.04 | 118.78 | <a href="#">H1508</a>       | Japonica | EC  |
| 110 | Wanqu 429bp      | Haerbin, Heilongjiang, China | 44.04 | 125.42 | <a href="#">HS2013003</a>   | Japonica | NEC |
| 111 | Yangfujing 4901  | Yangzhou, Jiangsu, China     | 32.24 | 119.26 | <a href="#">SS200811</a>    | Japonica | EC  |
| 112 | Yandao 6hao      | Yancheng, Jiangsu, China     | 33.38 | 120.13 | <a href="#">SS200205</a>    | Japonica | EC  |
| 113 | Cbao             | Hefei, Anhui, China          | 31.86 | 117.27 | <a href="#">H1661</a>       | Japonica | EC  |
| 114 | Zhengdao 10hao   | Zhenjiang, Jiangsu, China    | 32.2  | 119.44 | <a href="#">SS200710</a>    | Indica   | EC  |
| 115 | Baoxintaihuqing  | Wujiang, Jiangsu, China      | 31.16 | 120.63 | <a href="#">T834</a>        | Japonica | EC  |
| 116 | Huaidao 9hao     | Huaian, Jiangsu, China       | 33.5  | 119.15 | <a href="#">SS200607</a>    | Japonica | EC  |
| 117 | Xiaobaidao       | Wuxian, Jiangsu, China       | 31.32 | 120.62 | <a href="#">T208</a>        | Japonica | EC  |
| 118 | Yaxuenuo         | Wuxian, Jiangsu, China       | 31.26 | 121.63 | <a href="#">T480</a>        | Japonica | EC  |
| 119 | Yangguang 200    | Xuzhou, Jiangsu, China       | 34.15 | 117.11 | <a href="#">GS2008043</a>   | Japonica | EC  |
| 120 | Zaoshirihuangdao | Wuxian, Jiangsu, China       | 31.32 | 120.62 | <a href="#">T728</a>        | Japonica | EC  |
| 121 | Luohanhuang      | Jiangyin, Jiangsu, China     | 31.92 | 120.29 | <a href="#">T560</a>        | Japonica | EC  |
| 122 | Xudao2hao        | Xuzhou, Jiangsu, China       | 34.15 | 117.11 |                             | Japonica | EC  |
| 123 | Xudao9201B       | Xuzhou, Jiangsu, China       | 34.15 | 117.11 |                             | Japonica | EC  |

|     |                        |                             |       |        |                            |          |     |
|-----|------------------------|-----------------------------|-------|--------|----------------------------|----------|-----|
| 124 | Ebusinuodao            | Suihua, Heilongjiang, China | 46.63 | 126.98 | <a href="#">T386</a>       | Japonica | NEC |
| 125 | Yueguang               | Japan                       | 35.68 | 139.69 | <a href="#">H1660</a>      | Japonica | JP  |
| 126 | Yimuhu                 | Japan                       | 35.68 | 139.69 | <a href="#">Y1A01857</a>   | Indica   | JP  |
| 127 | Qingkong               | Nanjing, Jiangsu, China     | 32.04 | 118.78 | <a href="#">Y1A01858</a>   | Japonica | EC  |
| 128 | RT61                   | Japan                       | 35.68 | 139.69 | <a href="#">Y1A01863</a>   | Japonica | JP  |
| 129 | IL38                   | Japan                       | 35.68 | 139.69 | <a href="#">ZD-05554</a>   | Japonica | JP  |
| 130 | Liuyezhan              | Hubei, China                | 30    | 114    | <a href="#">17-00524</a>   | Indica   | CC  |
| 131 | Zaoxian 14             | Anhui, China                | 37.51 | 117.18 | <a href="#">11-00670</a>   | Indica   | EC  |
| 132 | Xu91075                | Xuzhou, Jiangsu, China      | 34.26 | 117.2  | <a href="#">H1418</a>      | Indica   | EC  |
| 133 | Xudao 25-7             | Xuzhou, Jiangsu, China      | 34.26 | 117.2  | <a href="#">H1419</a>      | Japonica | EC  |
| 134 | Qing 7                 | Yancheng, Jiangsu, China    | 33.38 | 120.13 | <a href="#">H1471</a>      | Indica   | EC  |
| 135 | Sihao 4141             | Sihong, Jiangsu, China      | 33.46 | 118.23 | <a href="#">H1332</a>      | Japonica | EC  |
| 136 | SH189                  | Sihong, Jiangsu, China      | 33.46 | 118.23 | <a href="#">Y1A01866</a>   | Japonica | EC  |
| 137 | SHN1                   | Sihong, Jiangsu, China      | 33.46 | 118.23 | <a href="#">Y1A01867</a>   | Indica   | EC  |
| 138 | Suwujing               | Wujin, Jiangsu, China       | 31.78 | 119.95 | <a href="#">SS201009</a>   | Indica   | EC  |
| 139 | 9522B                  | Changzhou, Jiangsu, China   | 31.79 | 119.95 | <a href="#">GS20000008</a> | Japonica | EC  |
| 140 | 863B                   | Nanjing, Jiangsu, China     | 32.04 | 118.78 | <a href="#">H1425</a>      | Japonica | EC  |
| 141 | Biaojiyongzijing       | Nanjing, Jiangsu, China     | 32.04 | 118.78 | <a href="#">H1427</a>      | Japonica | EC  |
| 142 | Zigu                   | Nanjing, Jiangsu, China     | 32.04 | 118.78 | <a href="#">H1437</a>      | Indica   | EC  |
| 143 | Jiangpuchangliheimidao | Nanjing, Jiangsu, China     | 32.04 | 118.78 | <a href="#">H1492</a>      | Indica   | EC  |
| 144 | A7444                  | Nanjing, Jiangsu, China     | 32.04 | 118.78 | <a href="#">H1476</a>      | Japonica | EC  |
| 145 | Xiepihuang             | Taicang, Jiangsu, China     | 31.45 | 121.1  | <a href="#">T203</a>       | Japonica | EC  |
| 146 | Shengtangqing          | Changshu, Jiangsu, China    | 31.64 | 120.74 | <a href="#">T759</a>       | Japonica | EC  |
| 147 | Chuan 6xian            | Chengdu, Sichuan, China     | 30.67 | 104.06 | <a href="#">H1506</a>      | Indica   | SWC |
| 148 | Chuan 5xian            | Chengdu, Sichuan, China     | 30.67 | 104.06 | <a href="#">H1507</a>      | Indica   | SWC |
| 149 | Shufeng 101            | Sichuan, China              | 30.39 | 104.05 | <a href="#">ZD-00760</a>   | Indica   | SWC |

|     |                    |                            |       |        |           |          |     |
|-----|--------------------|----------------------------|-------|--------|-----------|----------|-----|
| 150 | Chengnongshuijing  | Sichuan, China             | 30.39 | 104.05 | ZD-03386  | Indica   | SWC |
| 151 | Xiangxiandao 10hao | Changsha, Hunan, China     | 28.21 | 113    | H1486     | Indica   | CC  |
| 152 | II-32B             | Changsha, Hunan, China     | 28.21 | 113    | A0050     | Indica   | CC  |
| 153 | Chenwan 3hao       | Hunan, China               | 28.11 | 113    | ZD-00358  | Indica   | CC  |
| 154 | Xiangaizao 10hao   | Hunan, China               | 28.11 | 113    | ZD-01402  | Indica   | CC  |
| 155 | Yuetai B           | Fogang, Guangdong, China   | 23.86 | 113.52 | H1493     | Indica   | SC  |
| 156 | Qimiaoixiang 2hao  | Qingyuan, Guangdong, China | 23.7  | 113.01 | H1496     | Indica   | SC  |
| 157 | Shengyou 2hao      | Gaoyao, Guangdong, China   | 23.05 | 112.44 | YS1994004 | Indica   | SC  |
| 158 | Guichao 2hao       | Guangdong, China           | 23.08 | 113.15 | H1645     | Indica   | SC  |
| 159 | Minghui63          | Sanmingshi, Fujian, China  | 25.3  | 116.22 |           | Indica   | EC  |
| 160 | LongtepuB          | Fuzhou, Fujian, China      | 26.08 | 119.3  | H1490     | Indica   | EC  |
| 161 | Hainanxian R       | Hainan, China              | 19.52 | 109.57 | H1504     | Indica   | SC  |
| 162 | Zajiaohaigu        | Changjiang, Hainan, China  | 19.25 | 109.03 | H1510     | Indica   | SC  |
| 163 | Nuohangu           | Kunming, Yunnan, China     | 25.04 | 102.73 | H1434     | Japonica | SWC |
| 164 | Lincangwazuhangu   | Kunming, Yunnan, China     | 25.04 | 102.73 | H1435     | Japonica | SWC |
| 165 | Yuedao 55          | Vietnam                    | 10.22 | 106.01 | Y1A02409  | Indica   | SEA |
| 166 | Yuedao 108         | Vietnam                    | 10.22 | 106.01 | Y1A02355  | Indica   | SEA |
| 167 | IR112              | Philippines                | 14.6  | 121    | H1501     | Indica   | SEA |
| 168 | IR64               | Philippines                | 14.6  | 121    | H1502     | Indica   | SEA |
| 169 | Arias              | Indonesia                  | 6.08  | 94.45  | H1339     | Indica   | SEA |
| 170 | CAMOR              | Indonesia                  | 6.08  | 94.45  | 10861     | Japonica | SEA |
| 171 | Gendjah Gempol     | Indonesia                  | 6.08  | 94.45  | 12483     | Japonica | SEA |
| 172 | BULUH BAWU         | Indonesia                  | 6.08  | 94.45  | 16481     | Japonica | SEA |
| 173 | Shengdao 14        | Jinan, Shandong, China     | 36.4  | 117    | H1701     | Japonica | EC  |

<sup>a</sup> The word in black type indicated that these materials were saved by our lab; **T** showed the materials were from Taihu Lake; **H** showed that the materials were introduced by Hong; **C** showed that the materials were always saved by the lab. The word in blue type indicated that these materials were the approved variety; **CNA**

indicated the No. of variety right. **GS**, the abbreviation of guoshendao. **HS**, the abbreviation of heishendao. These indicated that the accessions were approved by Heilongjiang province. **JS**, the abbreviation of jishendao. These indicated that the accessions were approved by Jilin province. **LS**, the abbreviation of liaoshendao. These indicated that the accessions were approved by Liaoning province. **SS**, the abbreviation of sushendao. These indicated that the accessions were approved by Jiangsu province. **SZS**, the abbreviation of suzhongshen. These indicated the accessions were approved by Jiangsu province. **WPS**, the abbreviation of wanpinshen. These indicated that the accessions were approved by Anhui province. **WS**, the abbreviation of wanshendao. These indicated that the accessions were approved by Anhui province. **XS**, the abbreviation of xiangshendao. These indicated that the accessions were approved by Hunan province. **YS**, the abbreviation of yueshendao. These indicated that the accessions were approved by Guangdong province. SC, southern China; CC, central China; EC, eastern China; NEC, northeastern China; SWC, southwest China; JP, Japan; SEA, southeast Asia.



**Table S2.** Results of variance analysis for the flag leaf shape.

| Characteristics | Source of variation | df  | SS     | MS     | F-value  | P-value  |
|-----------------|---------------------|-----|--------|--------|----------|----------|
| FLL/cm          | Among genotypes     | 172 | 64790  | 376.7  | 36.62 ** | P<0.0001 |
| FLW/cm          | Among genotypes     | 172 | 122.4  | 0.7114 | 70.07 ** | P<0.0001 |
| FLR/cm          | Among genotypes     | 172 | 28424  | 165.3  | 41.15 ** | P<0.0001 |
| FLA/cm          | Among genotypes     | 172 | 173265 | 1007   | 42.86 ** | P<0.0001 |

df, degrees of freedom; SS, sum of squares; MS, mean square. \*\* Significant differences at  $P < 0.01$ . FLL, flag leaf length; FLW, flag leaf width; FLR, flag leaf length–width ratio; FLA, flag leaf area.

**Table S3.** Names and origins of 173 rice accessions used for association mapping and the corresponding Q values calculated by the STRUCTURE software.

| Code | Germplasm name    | Q1        | Q2        |
|------|-------------------|-----------|-----------|
| 1    | Longjing 22       | 0.005     | 0.995     |
| 2    | Longjing 28       | 0.051     | 0.949     |
| 3    | Longjing 27       | 0.019     | 0.981     |
| 4    | 24248             | 0.204     | 0.796     |
| 5    | Tijin             | 0.124     | 0.876     |
| 6    | Zhongguo 91       | 0.0793333 | 0.9206667 |
| 7    | Kangbingyueguang  | 0         | 1         |
| 8    | Sihao 4385        | 0         | 1         |
| 9    | Nannongjing 1R    | 0.299     | 0.701     |
| 10   | Hongmangshajing   | 0.968     | 0.032     |
| 11   | Wanhuangdao       | 0.114     | 0.886     |
| 12   | Xudao 3hao        | 0         | 1         |
| 13   | Youzhiyueguang    | 0         | 1         |
| 14   | Yuedao 68         | 1         | 0         |
| 15   | Longdao 8hao      | 0.058     | 0.942     |
| 16   | Longdao 6hao      | 0.057     | 0.943     |
| 17   | Qiutianxiaoding   | 0.002     | 0.998     |
| 18   | Zhenghan 2hao     | 0         | 1         |
| 19   | Xiangjing 9407    | 0.035     | 0.965     |
| 20   | Nongxiang 21      | 1         | 0         |
| 21   | Fengyouwan 8hao   | 1         | 0         |
| 22   | Xiangwanxian 17   | 0.121     | 0.879     |
| 23   | Yuedao 37         | 1         | 0         |
| 24   | Sujing 353        | 0.014     | 0.986     |
| 25   | Zhen9424          | 0         | 1         |
| 26   | Baikenuo          | 0.981     | 0.019     |
| 27   | Diantun502xuanzao | 1         | 0         |
| 28   | Yuedao 41         | 1         | 0         |
| 29   | Longnuo 3hao      | 0.047     | 0.953     |
| 30   | Mudanjiang 28     | 0.077     | 0.923     |
| 31   | Yujing 6hao       | 0.002     | 0.998     |
| 32   | Shengdao808       | 0.024     | 0.976     |
| 33   | Yuedao 32         | 1         | 0         |
| 34   | Yuedao 107        | 0.953     | 0.047     |
| 35   | Yuedao 61         | 1         | 0         |
| 36   | Yuedao 50         | 1         | 0         |
| 37   | Yuedao 109        | 1         | 0         |
| 38   | Yuedao 62         | 1         | 0         |
| 39   | Yuedao 66         | 1         | 0         |
| 40   | Hongnong 5hao     | 0.003     | 0.997     |
| 41   | Suyunuo           | 0         | 1         |
| 42   | Shenlenuo         | 0.078     | 0.922     |
| 43   | Hongjiaozhan      | 0.973     | 0.027     |

|    |                       |       |       |
|----|-----------------------|-------|-------|
| 44 | Wanjingnuo            | 0.001 | 0.999 |
| 45 | Nongxiang26           | 1     | 0     |
| 46 | Yuedao 9              | 1     | 0     |
| 47 | M1004                 | 0.106 | 0.894 |
| 48 | Nongxiang 25          | 1     | 0     |
| 49 | Longjing 20           | 0.039 | 0.961 |
| 50 | Xiangchuanwuxinbaimi  | 0.949 | 0.051 |
| 51 | Jindao 1007           | 0.038 | 0.962 |
| 52 | Zaijinjing            | 0.049 | 0.951 |
| 53 | Malaihong             | 0.782 | 0.218 |
| 54 | Nannongjing3786       | 0.028 | 0.972 |
| 55 | Wuyunjing 8hao        | 0     | 1     |
| 56 | Yuzhenxiang           | 0.651 | 0.349 |
| 57 | Yuedao24(LCV18)       | 1     | 0     |
| 58 | Yuedao 3              | 1     | 0     |
| 59 | Yuedao 43             | 0.98  | 0.02  |
| 60 | Yuedao 48             | 1     | 0     |
| 61 | Yuedao 49             | 1     | 0     |
| 62 | Yuedao 13             | 1     | 0     |
| 63 | Wumangyedaο           | 0.056 | 0.944 |
| 64 | Haobuqia              | 1     | 0     |
| 65 | Yuedao 22             | 1     | 0     |
| 66 | Dongzhengwuyunjing 21 | 0.088 | 0.912 |
| 67 | Yandao 8hao           | 0     | 1     |
| 68 | Huaidao 11hao         | 0     | 1     |
| 69 | Nannongjing 004       | 0.002 | 0.998 |
| 70 | Zhongzuo 93           | 0     | 1     |
| 71 | Xudao 5hao            | 0     | 1     |
| 72 | Digludao              | 0.014 | 0.986 |
| 73 | Huaidao 8hao          | 0     | 1     |
| 74 | Dongzheng 1640        | 0.017 | 0.983 |
| 75 | Yanjing 8hao          | 0     | 1     |
| 76 | Huifeng 2             | 0     | 1     |
| 77 | Yandao 9hao           | 0     | 1     |
| 78 | Lianjing 4hao         | 0.038 | 0.962 |
| 79 | Huifeng 1             | 0     | 1     |
| 80 | Sihao 4280            | 0     | 1     |
| 81 | Sihao 4330            | 0     | 1     |
| 82 | Sihao 4259            | 0.06  | 0.94  |
| 83 | Zhengdao 18           | 0     | 1     |
| 84 | Jingnuo 330           | 0.026 | 0.974 |
| 85 | Zhongjing 212         | 0.063 | 0.937 |
| 86 | Wuyunjing 21hao       | 0     | 1     |
| 87 | Huajing 6hao          | 0.025 | 0.975 |
| 88 | Yangfujing 8hao       | 0     | 1     |
| 89 | Zhendao 99            | 0     | 1     |

|     |                  |           |           |
|-----|------------------|-----------|-----------|
| 90  | Ningjing 2hao    | 0         | 1         |
| 91  | Huajing 5hao     | 0.199     | 0.801     |
| 92  | Zhongjing 9677   | 0.013     | 0.987     |
| 93  | Yangfujing 7hao  | 0         | 1         |
| 94  | Yuedao 12        | 1         | 0         |
| 95  | Jianongnuo 2hao  | 0.005     | 0.995     |
| 96  | Xudao 4hao       | 0.001     | 0.999     |
| 97  | Sihao 4040       | 0.015     | 0.985     |
| 98  | Yanjing 9hao     | 0         | 1         |
| 99  | Sihao 4081       | 0.072     | 0.928     |
| 100 | Sihao 4041       | 0.043     | 0.957     |
| 101 | Sihao 4031       | 0.34      | 0.66      |
| 102 | Wandao 68        | 0.103     | 0.897     |
| 103 | Wuxiang99-8      | 0.001     | 0.999     |
| 104 | Zhongjing 131    | 0         | 1         |
| 105 | Ningjinghui 260  | 0.026     | 0.974     |
| 106 | Ningjinghui 237  | 0.129     | 0.871     |
| 107 | Wunuoyihao       | 0.002     | 0.998     |
| 108 | Sihao 4029       | 0.024     | 0.976     |
| 109 | Ludao            | 0.1686667 | 0.8313333 |
| 110 | Wanqu 429bp      | 0.006     | 0.994     |
| 111 | Yangfujing 4901  | 0         | 1         |
| 112 | Yandao 6hao      | 0.072     | 0.928     |
| 113 | Cbao             | 0.128     | 0.872     |
| 114 | Zhengdao 10hao   | 1         | 0         |
| 115 | Baoxintaihuqing  | 0.765     | 0.235     |
| 116 | Huaidao 9hao     | 0.071     | 0.929     |
| 117 | Xiaobaidao       | 0.081     | 0.919     |
| 118 | Yaxuenuo         | 0.096     | 0.904     |
| 119 | Yangguang 200    | 0         | 1         |
| 120 | Zaoshirihuangdao | 0.151     | 0.849     |
| 121 | Luohanhuang      | 0.07      | 0.93      |
| 122 | Xudao2hao        | 0.163     | 0.837     |
| 123 | Xudao9201B       | 0.009     | 0.991     |
| 124 | Ebusinuodao      | 0.082     | 0.918     |
| 125 | Yueguang         | 0         | 1         |
| 126 | Yimuhu           | 1         | 0         |
| 127 | Qingkong         | 0.001     | 0.999     |
| 128 | RT61             | 0         | 1         |
| 129 | IL38             | 0         | 1         |
| 130 | Liuyezhan        | 1         | 0         |
| 131 | Zaoxian 14       | 0.991     | 0.009     |
| 132 | Xu91075          | 1         | 0         |
| 133 | Xudao 25-7       | 0         | 1         |
| 134 | Qing 7           | 1         | 0         |
| 135 | Sihao 4141       | 0         | 1         |

|     |                        |           |           |
|-----|------------------------|-----------|-----------|
| 136 | SH189                  | 0.481     | 0.519     |
| 137 | SHN1                   | 1         | 0         |
| 138 | Suwujing               | 0.999     | 0.001     |
| 139 | 9522B                  | 0         | 1         |
| 140 | 863B                   | 0.056     | 0.944     |
| 141 | Biaojiyongzijing       | 0.191     | 0.809     |
| 142 | Zigu                   | 0.974     | 0.026     |
| 143 | Jiangpuchangliheimidao | 0.874     | 0.126     |
| 144 | A7444                  | 0.42      | 0.58      |
| 145 | Xiepihuang             | 0.065     | 0.935     |
| 146 | Shengtangqing          | 0.821     | 0.179     |
| 147 | Chuan 6xian            | 0.992     | 0.008     |
| 148 | Chuan 5xian            | 0.993     | 0.007     |
| 149 | Shufeng 101            | 1         | 0         |
| 150 | Chengnongshuijing      | 1         | 0         |
| 151 | Xiangxiandao 10hao     | 0.976     | 0.024     |
| 152 | II-32B                 | 0.98      | 0.02      |
| 153 | Chenwan 3hao           | 1         | 0         |
| 154 | Xiangaizao 10hao       | 1         | 0         |
| 155 | Yuetai B               | 0.992     | 0.008     |
| 156 | Qimiauxiang 2hao       | 1         | 0         |
| 157 | Shengyou 2hao          | 0.98      | 0.02      |
| 158 | Guichao 2hao           | 1         | 0         |
| 159 | Minghui63              | 1         | 0         |
| 160 | LongtepuB              | 1         | 0         |
| 161 | Hainanxian R           | 0.996     | 0.004     |
| 162 | Zajiaohaigu            | 1         | 0         |
| 163 | Nuohangu               | 0.4056667 | 0.5943333 |
| 164 | Lincangwazuhangu       | 0.409     | 0.591     |
| 165 | Yuedao 55              | 1         | 0         |
| 166 | Yuedao 108             | 0.953     | 0.047     |
| 167 | IR112                  | 1         | 0         |
| 168 | IR64                   | 1         | 0         |
| 169 | Arias                  | 0.981     | 0.019     |
| 170 | CAMOR                  | 0.471     | 0.529     |
| 171 | Gendjah Gempol         | 0.512     | 0.488     |
| 172 | BULUH BAWU             | 0.449     | 0.551     |
| 173 | Shengdao 14            | 0         | 1         |

---

**Table S4.** SNP Position for FLL, FLW, FLR and FLW identified by GWAS in 2019 or 2020.

| Trait | QTLs            | Chr | SNP      | Allele | P-value                | FDR                    | PVE(%) | Model | Year |
|-------|-----------------|-----|----------|--------|------------------------|------------------------|--------|-------|------|
| FLR   | <i>qFLR3</i>    | 3   | 15068252 | C/G    | $5.12 \times 10^{-6}$  | $9.10 \times 10^{-6}$  | 15.14  | MLM   | 2019 |
|       | <i>qFLR9</i>    | 9   | 15134940 | C/A    | $9.58 \times 10^{-6}$  | $9.89 \times 10^{-6}$  | 14.30  | MLM   | 2019 |
|       |                 | 9   | 15134940 | C/A    | $1.06 \times 10^{-8}$  | $2.56 \times 10^{-8}$  | 18.76  | GLM   | 2019 |
|       | <i>qFLR11.1</i> | 11  | 14965952 | C/T    | $4.46 \times 10^{-6}$  | $8.83 \times 10^{-6}$  | 12.99  | MLM   | 2019 |
|       |                 | 11  | 14965952 | C/T    | $2.23 \times 10^{-9}$  | $9.7 \times 10^{-9}$   | 18.27  | GLM   | 2019 |
|       | <i>qFLR11.2</i> | 11  | 15298215 | G/A    | $4.46 \times 10^{-6}$  | $8.83 \times 10^{-6}$  | 12.99  | MLM   | 2019 |
|       |                 | 11  | 15298215 | G/A    | $2.23 \times 10^{-9}$  | $9.53 \times 10^{-9}$  | 18.27  | GLM   | 2019 |
|       | <i>qFLR12.1</i> | 12  | 19498080 | A/G    | $9.89 \times 10^{-6}$  | $9.9 \times 10^{-6}$   | 11.99  | MLM   | 2019 |
|       |                 | 12  | 19498080 | A/G    | $1.55 \times 10^{-11}$ | $8.05 \times 10^{-10}$ | 22.60  | GLM   | 2019 |
|       | <i>qFLL10.1</i> | 10  | 19957979 | T/G    | $5.56 \times 10^{-6}$  | $8.53 \times 10^{-6}$  | 14.68  | MLM   | 2020 |
| FLL   |                 | 10  | 19957979 | T/G    | $9.42 \times 10^{-10}$ | $5.06 \times 10^{-9}$  | 16.35  | GLM   | 2020 |
| FLR   | <i>qFLR12.2</i> | 12  | 21026552 | G/A    | $1.35 \times 10^{-6}$  | $7.68 \times 10^{-6}$  | 14.52  | MLM   | 2020 |
|       |                 | 12  | 21026552 | G/A    | $2.75 \times 10^{-9}$  | $9.44 \times 10^{-9}$  | 18.16  | GLM   | 2020 |
| FLA   | <i>qFLA10</i>   | 10  | 19957979 | T/G    | $9.56 \times 10^{-6}$  | $9.6 \times 10^{-6}$   | 13.86  | MLM   | 2020 |
|       |                 | 10  | 19957979 | T/G    | $2.78 \times 10^{-8}$  | $3.07 \times 10^{-8}$  | 11.99  | GLM   | 2020 |

PVE, phenotypic variation explanation ratio.

**Table S5.** Candidate gene annotation in the LD region 34.5-35.2Mb associated with FLW

| Number | Gene ID             | MSU ID                | Position(bp)      | Annotation                                                         |
|--------|---------------------|-----------------------|-------------------|--------------------------------------------------------------------|
| 1      | <i>Os02g0811400</i> | <i>LOC_Os02g56680</i> | 34742561-34743972 | dehydrogenase                                                      |
| 2      | <i>Os02g0811600</i> | <i>LOC_Os02g56690</i> | 34757658-34759138 | dihydroflavonol-4-reductase                                        |
| 3      | <i>Os02g0811800</i> | <i>LOC_Os02g56700</i> | 34764348-34766529 | dehydrogenase                                                      |
| 4      | <i>Os02g0812000</i> | <i>LOC_Os02g56720</i> | 34769644-34771168 | cinnamoyl CoA reductase                                            |
| 5      | <i>Os02g0812400</i> | <i>LOC_Os02g56740</i> | 34784179-34793387 | translation initiation factor eIF-2B subunit epsilon               |
| 6      | <i>Os02g0812500</i> | <i>LOC_Os02g56750</i> | 34794245-34796635 | OsFBX65 - F-box domain containing protein                          |
| 7      | <i>Os02g0812600</i> | <i>LOC_Os02g56760</i> | 34798281-34801473 | OsFBX66 - F-box domain containing protein                          |
| 8      | <i>Os02g0812700</i> | <i>LOC_Os02g56770</i> | 34802001-34814925 | OsFBX67 - F-box domain containing protein                          |
| 9      | <i>Os02g0812700</i> | <i>LOC_Os02g56800</i> | 34802001-34814925 | F-box protein PP2-B2                                               |
| 10     | <i>Os02g0813083</i> | <i>LOC_Os02g56810</i> | 34819425-34819769 | OsFBX68 - F-box domain containing protein                          |
| 11     | <i>Os02g0813166</i> | <i>LOC_Os02g56820</i> | 34824765-34825820 | OsFBX69 - F-box domain containing protein                          |
| 12     | <i>Os02g0813350</i> | <i>LOC_Os02g56840</i> | 34833967-34835972 | OsFBX70 - F-box domain containing protein                          |
| 13     | <i>Os02g0813500</i> | <i>LOC_Os02g56850</i> | 34837853-34843851 | glutathione reductase                                              |
| 14     | <i>Os02g0813600</i> | <i>LOC_Os02g56860</i> | 34853787-34855494 | 3-ketoacyl-CoA synthase                                            |
| 15     | <i>None</i>         | <i>LOC_Os02g56870</i> | 34862140-34861776 | DEFL38 - Defensin and Defensin-like DEFL family                    |
| 16     | <i>Os02g0813800</i> | <i>LOC_Os02g56880</i> | 34862555-34872880 | transcriptional corepressor LEUNIG                                 |
| 17     | <i>None</i>         | <i>LOC_Os02g56890</i> | 34877844-34877599 | CXXXC10 - Cysteine-rich protein with paired CXXXC motifs precursor |
| 18     | <i>Os02g0814000</i> | <i>LOC_Os02g56900</i> | 34879586-34880996 | thioredoxin family protein                                         |
| 19     | <i>Os02g0814100</i> | <i>LOC_Os02g56910</i> | 34883096-34885449 | lecithine cholesterol acyltransferase                              |
| 20     | <i>Os02g0814200</i> | <i>LOC_Os02g56920</i> | 34889675-34893873 | WAX2                                                               |
| 21     | <i>Os02g0814700</i> | <i>LOC_Os02g56960</i> | 34911047-34913456 | ribosomal protein                                                  |
| 22     | <i>Os02g0814800</i> | <i>LOC_Os02g56970</i> | 34913714-34915475 | uncharacterized protein yqjG                                       |
| 23     | <i>Os02g0814900</i> | <i>LOC_Os02g56980</i> | 34916323-34917986 | cytidyltransferase domain containing protein                       |
| 24     | <i>Os02g0815000</i> | <i>LOC_Os02g56990</i> | 34918065-34919918 | ribosomal protein L37                                              |
| 25     | <i>Os02g0815100</i> | <i>LOC_Os02g57000</i> | 34920542-34921736 | C2 domain containing protein                                       |

|    |                     |                       |                   |                                                              |
|----|---------------------|-----------------------|-------------------|--------------------------------------------------------------|
| 26 | <i>Os02g0815200</i> | <i>LOC_Os02g57010</i> | 34922504-34924759 | RNA recognition motif containing protein                     |
| 27 | <i>Os02g0815300</i> | <i>LOC_Os02g57020</i> | 34925371-34926093 | YCF37                                                        |
| 28 | <i>Os02g0815500</i> | <i>LOC_Os02g57040</i> | 34930323-34934022 | dehydrogenase                                                |
| 29 | <i>Os02g0815600</i> | <i>LOC_Os02g57050</i> | 34934560-34936977 | diphthamide biosynthesis protein                             |
| 30 | <i>Os02g0815700</i> | <i>LOC_Os02g57060</i> | 34937314-34941399 | OsCttP2 - Putative C-terminal processing peptidase homologue |
| 31 | <i>Os02g0815800</i> | <i>LOC_Os02g57070</i> | 34941327-34944075 | 3-5 exoribonuclease CSL4                                     |
| 32 | <i>Os02g0815900</i> | <i>LOC_Os02g57080</i> | 34945082-34952009 | serine/threonine-protein kinase                              |

---



**Table S6.** SNP information in 34.5-35.2Mb candidate region for FLW

| <b>MSU ID</b>         | <b>Gene ID</b>      | <b>SNP Location</b> | <b>Reference</b> | <b>Alternative</b> | <b>Region</b> | <b>Variation type</b> |
|-----------------------|---------------------|---------------------|------------------|--------------------|---------------|-----------------------|
| <i>LOC_Os02g56680</i> | <i>Os02g0811400</i> | 2_34741992          | G                | T                  | upstream      |                       |
| <i>LOC_Os02g56680</i> | <i>Os02g0811400</i> | 2_34742385          | C                | G                  | upstream      |                       |
| <i>LOC_Os02g56680</i> | <i>Os02g0811400</i> | 2_34742482          | A                | T                  | upstream      |                       |
| <i>LOC_Os02g56680</i> | <i>Os02g0811400</i> | 2_34742671          | T                | C                  | exonic        |                       |
| <i>LOC_Os02g56680</i> | <i>Os02g0811400</i> | 2_34742674          | C                | G                  | exonic        |                       |
| <i>LOC_Os02g56680</i> | <i>Os02g0811400</i> | 2_34742741          | T                | A                  | intronic      |                       |
| <i>LOC_Os02g56680</i> | <i>Os02g0811400</i> | 2_34743982          | T                | A                  | downstream    |                       |
| <i>LOC_Os02g56680</i> | <i>Os02g0811400</i> | 2_34744233          | T                | C                  | downstream    |                       |
| <i>LOC_Os02g56690</i> | <i>Os02g0811600</i> | 2_34756724          | C                | T                  | upstream      |                       |
| <i>LOC_Os02g56691</i> | <i>Os02g0811600</i> | 2_34756739          | A                | G                  | upstream      |                       |
| <i>LOC_Os02g56692</i> | <i>Os02g0811600</i> | 2_34756838          | T                | G                  | upstream      |                       |
| <i>LOC_Os02g56693</i> | <i>Os02g0811600</i> | 2_34756932          | C                | T                  | upstream      |                       |
| <i>LOC_Os02g56694</i> | <i>Os02g0811600</i> | 2_34757015          | A                | G                  | upstream      |                       |
| <i>LOC_Os02g56695</i> | <i>Os02g0811600</i> | 2_34757017          | A                | G                  | upstream      |                       |
| <i>LOC_Os02g56696</i> | <i>Os02g0811600</i> | 2_34757036          | C                | T                  | upstream      |                       |
| <i>LOC_Os02g56697</i> | <i>Os02g0811600</i> | 2_34757187          | A                | G                  | upstream      |                       |
| <i>LOC_Os02g56698</i> | <i>Os02g0811600</i> | 2_34757227          | C                | G                  | upstream      |                       |
| <i>LOC_Os02g56699</i> | <i>Os02g0811600</i> | 2_34757255          | T                | C                  | upstream      |                       |
| <i>LOC_Os02g56700</i> | <i>Os02g0811600</i> | 2_34757256          | G                | A                  | upstream      |                       |
| <i>LOC_Os02g56701</i> | <i>Os02g0811600</i> | 2_34757263          | A                | T                  | upstream      |                       |
| <i>LOC_Os02g56702</i> | <i>Os02g0811600</i> | 2_34757518          | C                | T                  | upstream      |                       |
| <i>LOC_Os02g56690</i> | <i>Os02g0811600</i> | 2_34758013          | T                | A                  | intronic      |                       |
| <i>LOC_Os02g56700</i> | <i>Os02g0811800</i> | 2_34766110          | T                | C                  | exonic        |                       |
| <i>LOC_Os02g56700</i> | <i>Os02g0811800</i> | 2_34766146          | C                | T                  | exonic        |                       |
| <i>LOC_Os02g56700</i> | <i>Os02g0811800</i> | 2_34766191          | A                | G                  | exonic        |                       |
| <i>LOC_Os02g56720</i> | <i>Os02g0812000</i> | 2_34770862          | G                | T                  | exonic        |                       |
| <i>LOC_Os02g56720</i> | <i>Os02g0812000</i> | 2_34770924          | A                | C                  | intronic      |                       |
| <i>LOC_Os02g56720</i> | <i>Os02g0812000</i> | 2_34770943          | T                | C                  | intronic      |                       |
| <i>LOC_Os02g56720</i> | <i>Os02g0812000</i> | 2_34771083          | C                | T                  | exonic        |                       |
| <i>LOC_Os02g56720</i> | <i>Os02g0812000</i> | 2_34771134          | A                | G                  | UTR3          |                       |
| <i>LOC_Os02g56720</i> | <i>Os02g0812000</i> | 2_34771214          | T                | A                  | downstream    |                       |
| <i>LOC_Os02g56720</i> | <i>Os02g0812000</i> | 2_34771234          | A                | G                  | downstream    |                       |
| <i>LOC_Os02g56720</i> | <i>Os02g0812000</i> | 2_34771290          | C                | T                  | downstream    |                       |
| <i>LOC_Os02g56720</i> | <i>Os02g0812000</i> | 2_34771422          | A                | G                  | downstream    |                       |
| <i>LOC_Os02g56720</i> | <i>Os02g0812000</i> | 2_34771463          | T                | A                  | downstream    |                       |
| <i>LOC_Os02g56720</i> | <i>Os02g0812000</i> | 2_34771576          | C                | T                  | downstream    |                       |
| <i>LOC_Os02g56720</i> | <i>Os02g0812000</i> | 2_34771603          | G                | A                  | downstream    |                       |
| <i>LOC_Os02g56720</i> | <i>Os02g0812000</i> | 2_34771647          | C                | T                  | downstream    |                       |
| <i>LOC_Os02g56720</i> | <i>Os02g0812000</i> | 2_34771691          | T                | C                  | downstream    |                       |
| <i>LOC_Os02g56720</i> | <i>Os02g0812000</i> | 2_34771755          | G                | A                  | downstream    |                       |
| <i>LOC_Os02g56720</i> | <i>Os02g0812000</i> | 2_34772118          | C                | T                  | downstream    |                       |
| <i>LOC_Os02g56740</i> | <i>Os02g0812400</i> | 2_34783226          | C                | T                  | upstream      |                       |
| <i>LOC_Os02g56740</i> | <i>Os02g0812400</i> | 2_34783281          | G                | A                  | upstream      |                       |
| <i>LOC_Os02g56740</i> | <i>Os02g0812400</i> | 2_34783388          | T                | C                  | upstream      |                       |

|                |              |            |   |   |          |
|----------------|--------------|------------|---|---|----------|
| LOC_Os02g56740 | Os02g0812400 | 2_34783577 | G | C | upstream |
| LOC_Os02g56740 | Os02g0812400 | 2_34783778 | A | G | upstream |
| LOC_Os02g56740 | Os02g0812400 | 2_34783805 | C | T | upstream |
| LOC_Os02g56740 | Os02g0812400 | 2_34783899 | G | A | upstream |
| LOC_Os02g56740 | Os02g0812400 | 2_34783927 | G | A | upstream |
| LOC_Os02g56740 | Os02g0812400 | 2_34783936 | T | A | upstream |
| LOC_Os02g56740 | Os02g0812400 | 2_34783997 | C | T | upstream |
| LOC_Os02g56740 | Os02g0812400 | 2_34784022 | C | G | upstream |
| LOC_Os02g56740 | Os02g0812400 | 2_34784065 | C | T | upstream |
| LOC_Os02g56740 | Os02g0812400 | 2_34784617 | G | A | exonic   |
| LOC_Os02g56740 | Os02g0812400 | 2_34784688 | C | T | exonic   |
| LOC_Os02g56740 | Os02g0812400 | 2_34784783 | A | G | intronic |
| LOC_Os02g56740 | Os02g0812400 | 2_34784820 | A | G | intronic |
| LOC_Os02g56740 | Os02g0812400 | 2_34784920 | T | G | intronic |
| LOC_Os02g56740 | Os02g0812400 | 2_34785330 | C | T | exonic   |
| LOC_Os02g56740 | Os02g0812400 | 2_34785364 | T | C | exonic   |
| LOC_Os02g56740 | Os02g0812400 | 2_34785444 | G | A | exonic   |
| LOC_Os02g56740 | Os02g0812400 | 2_34785512 | A | T | intronic |
| LOC_Os02g56740 | Os02g0812400 | 2_34785801 | A | G | intronic |
| LOC_Os02g56740 | Os02g0812400 | 2_34785995 | A | G | exonic   |
| LOC_Os02g56740 | Os02g0812400 | 2_34786098 | G | T | intronic |
| LOC_Os02g56740 | Os02g0812400 | 2_34787139 | A | G | intronic |
| LOC_Os02g56740 | Os02g0812400 | 2_34787881 | T | C | intronic |
| LOC_Os02g56740 | Os02g0812400 | 2_34787894 | T | C | intronic |
| LOC_Os02g56740 | Os02g0812400 | 2_34788348 | C | T | intronic |
| LOC_Os02g56740 | Os02g0812400 | 2_34788369 | A | T | intronic |
| LOC_Os02g56740 | Os02g0812400 | 2_34788411 | C | G | intronic |
| LOC_Os02g56740 | Os02g0812400 | 2_34788474 | A | C | intronic |
| LOC_Os02g56740 | Os02g0812400 | 2_34788709 | C | T | intronic |
| LOC_Os02g56740 | Os02g0812400 | 2_34788784 | C | G | intronic |
| LOC_Os02g56740 | Os02g0812400 | 2_34788835 | A | C | intronic |
| LOC_Os02g56740 | Os02g0812400 | 2_34788864 | T | A | intronic |
| LOC_Os02g56740 | Os02g0812400 | 2_34789050 | A | T | intronic |
| LOC_Os02g56740 | Os02g0812400 | 2_34789358 | G | A | intronic |
| LOC_Os02g56740 | Os02g0812400 | 2_34789361 | G | A | intronic |
| LOC_Os02g56740 | Os02g0812400 | 2_34789636 | C | G | exonic   |
| LOC_Os02g56740 | Os02g0812400 | 2_34790439 | T | C | intronic |
| LOC_Os02g56740 | Os02g0812400 | 2_34790479 | A | G | intronic |
| LOC_Os02g56740 | Os02g0812400 | 2_34790789 | C | T | intronic |
| LOC_Os02g56740 | Os02g0812400 | 2_34791152 | C | T | intronic |
| LOC_Os02g56740 | Os02g0812400 | 2_34791393 | G | T | intronic |
| LOC_Os02g56740 | Os02g0812400 | 2_34791395 | G | T | intronic |
| LOC_Os02g56740 | Os02g0812400 | 2_34791432 | G | T | intronic |
| LOC_Os02g56740 | Os02g0812400 | 2_34792163 | T | C | exonic   |
| LOC_Os02g56740 | Os02g0812400 | 2_34792275 | T | A | intronic |
| LOC_Os02g56740 | Os02g0812400 | 2_34793112 | C | A | UTR3     |

|                |              |            |   |   |            |               |
|----------------|--------------|------------|---|---|------------|---------------|
| LOC_Os02g56750 | Os02g0812500 | 2_34794308 | T | A | UTR5       |               |
| LOC_Os02g56750 | Os02g0812500 | 2_34795012 | G | C | intronic   |               |
| LOC_Os02g56750 | Os02g0812500 | 2_34795072 | T | C | intronic   |               |
| LOC_Os02g56750 | Os02g0812500 | 2_34795259 | G | C | intronic   |               |
| LOC_Os02g56750 | Os02g0812500 | 2_34795309 | T | C | intronic   |               |
| LOC_Os02g56750 | Os02g0812500 | 2_34795437 | C | T | intronic   |               |
| LOC_Os02g56750 | Os02g0812500 | 2_34796411 | G | T | UTR3       |               |
| LOC_Os02g56750 | Os02g0812500 | 2_34796440 | G | C | UTR3       |               |
| LOC_Os02g56750 | Os02g0812500 | 2_34796640 | A | G | downstream |               |
| LOC_Os02g56750 | Os02g0812500 | 2_34796652 | T | C | downstream |               |
| LOC_Os02g56750 | Os02g0812500 | 2_34796776 | C | T | downstream |               |
| LOC_Os02g56750 | Os02g0812500 | 2_34796780 | G | A | downstream |               |
| LOC_Os02g56750 | Os02g0812500 | 2_34796861 | T | C | downstream |               |
| LOC_Os02g56750 | Os02g0812500 | 2_34797004 | C | T | downstream |               |
| LOC_Os02g56750 | Os02g0812500 | 2_34797007 | C | T | downstream |               |
| LOC_Os02g56750 | Os02g0812500 | 2_34797169 | G | A | downstream |               |
| LOC_Os02g56750 | Os02g0812500 | 2_34797180 | A | G | downstream |               |
| LOC_Os02g56750 | Os02g0812500 | 2_34797243 | G | A | downstream |               |
| LOC_Os02g56760 | Os02g0812600 | 2_34798618 | C | G | intronic   |               |
| LOC_Os02g56760 | Os02g0812600 | 2_34798854 | A | C | intronic   |               |
| LOC_Os02g56760 | Os02g0812600 | 2_34798895 | T | A | intronic   |               |
| LOC_Os02g56760 | Os02g0812600 | 2_34798977 | T | A | intronic   |               |
| LOC_Os02g56760 | Os02g0812600 | 2_34799006 | G | A | intronic   |               |
| LOC_Os02g56760 | Os02g0812600 | 2_34799092 | G | T | intronic   |               |
| LOC_Os02g56760 | Os02g0812600 | 2_34799113 | A | T | intronic   |               |
| LOC_Os02g56760 | Os02g0812600 | 2_34799418 | C | A | intronic   |               |
| LOC_Os02g56760 | Os02g0812600 | 2_34799532 | A | C | intronic   |               |
| LOC_Os02g56760 | Os02g0812600 | 2_34799607 | A | C | intronic   |               |
| LOC_Os02g56760 | Os02g0812600 | 2_34799617 | C | T | intronic   |               |
| LOC_Os02g56760 | Os02g0812600 | 2_34799877 | T | C | exonic     | synonymous    |
| LOC_Os02g56760 | Os02g0812600 | 2_34799960 | A | G | exonic     | nonsynonymous |
| LOC_Os02g56760 | Os02g0812600 | 2_34800034 | G | T | exonic     | nonsynonymous |
| LOC_Os02g56760 | Os02g0812600 | 2_34800081 | T | C | exonic     | synonymous    |
| LOC_Os02g56760 | Os02g0812600 | 2_34800278 | G | A | exonic     | synonymous    |
| LOC_Os02g56760 | Os02g0812600 | 2_34800452 | T | A | intronic   |               |
| LOC_Os02g56760 | Os02g0812600 | 2_34800604 | C | G | intronic   |               |
| LOC_Os02g56760 | Os02g0812600 | 2_34800719 | C | G | intronic   |               |
| LOC_Os02g56760 | Os02g0812600 | 2_34800733 | G | A | intronic   |               |
| LOC_Os02g56760 | Os02g0812600 | 2_34800741 | T | C | intronic   |               |
| LOC_Os02g56760 | Os02g0812600 | 2_34800789 | C | T | intronic   |               |
| LOC_Os02g56760 | Os02g0812600 | 2_34800799 | G | A | intronic   |               |
| LOC_Os02g56760 | Os02g0812600 | 2_34800812 | T | G | intronic   |               |
| LOC_Os02g56760 | Os02g0812600 | 2_34800888 | C | A | intronic   |               |

|                |              |            |   |   |            |                |
|----------------|--------------|------------|---|---|------------|----------------|
| LOC_Os02g56760 | Os02g0812600 | 2_34801004 | G | A | intronic   |                |
| LOC_Os02g56760 | Os02g0812600 | 2_34801161 | T | C | exonic     | synonymou<br>s |
| LOC_Os02g56760 | Os02g0812600 | 2_34801168 | A | C | exonic     | synonymou<br>s |
| LOC_Os02g56760 | Os02g0812600 | 2_34801266 | A | C | exonic     | synonymou<br>s |
| LOC_Os02g56770 | Os02g0812700 | 2_34814272 | G | A | intronic   |                |
| LOC_Os02g56770 | Os02g0812700 | 2_34814272 | G | A | intronic   |                |
| LOC_Os02g56770 | Os02g0812700 | 2_34814328 | T | C | UTR3       |                |
| LOC_Os02g56770 | Os02g0812700 | 2_34814328 | T | C | UTR3       |                |
| LOC_Os02g56770 | Os02g0812700 | 2_34814504 | G | T | UTR3       |                |
| LOC_Os02g56770 | Os02g0812700 | 2_34814504 | G | T | UTR3       |                |
| LOC_Os02g56770 | Os02g0812700 | 2_34814564 | C | T | UTR3       |                |
| LOC_Os02g56770 | Os02g0812700 | 2_34814564 | C | T | UTR3       |                |
| LOC_Os02g56770 | Os02g0812700 | 2_34814580 | G | A | UTR3       |                |
| LOC_Os02g56770 | Os02g0812700 | 2_34814580 | G | A | UTR3       |                |
| LOC_Os02g56770 | Os02g0812700 | 2_34814987 | T | A | downstream |                |
| LOC_Os02g56770 | Os02g0812700 | 2_34814987 | T | A | downstream |                |
| LOC_Os02g56770 | Os02g0812700 | 2_34815002 | C | T | downstream |                |
| LOC_Os02g56770 | Os02g0812700 | 2_34815002 | C | T | downstream |                |
| LOC_Os02g56770 | Os02g0812700 | 2_34815023 | T | C | downstream |                |
| LOC_Os02g56770 | Os02g0812700 | 2_34815023 | T | C | downstream |                |
| LOC_Os02g56770 | Os02g0812700 | 2_34815104 | A | G | downstream |                |
| LOC_Os02g56770 | Os02g0812700 | 2_34815104 | A | G | downstream |                |
| LOC_Os02g56770 | Os02g0812700 | 2_34815129 | G | A | downstream |                |
| LOC_Os02g56770 | Os02g0812700 | 2_34815129 | G | A | downstream |                |
| LOC_Os02g56770 | Os02g0812700 | 2_34815136 | A | G | downstream |                |
| LOC_Os02g56770 | Os02g0812700 | 2_34815136 | A | G | downstream |                |
| LOC_Os02g56770 | Os02g0812700 | 2_34815148 | C | A | downstream |                |
| LOC_Os02g56770 | Os02g0812700 | 2_34815148 | C | A | downstream |                |
| LOC_Os02g56770 | Os02g0812700 | 2_34815156 | G | A | downstream |                |
| LOC_Os02g56770 | Os02g0812700 | 2_34815156 | G | A | downstream |                |
| LOC_Os02g56770 | Os02g0812700 | 2_34815172 | C | T | downstream |                |
| LOC_Os02g56770 | Os02g0812700 | 2_34815172 | C | T | downstream |                |
| LOC_Os02g56770 | Os02g0812700 | 2_34815190 | C | T | downstream |                |
| LOC_Os02g56770 | Os02g0812700 | 2_34815190 | C | T | downstream |                |
| LOC_Os02g56770 | Os02g0812700 | 2_34815295 | G | A | downstream |                |
| LOC_Os02g56770 | Os02g0812700 | 2_34815295 | G | A | downstream |                |
| LOC_Os02g56770 | Os02g0812700 | 2_34815296 | A | T | downstream |                |
| LOC_Os02g56770 | Os02g0812700 | 2_34815296 | A | T | downstream |                |
| LOC_Os02g56770 | Os02g0812700 | 2_34815466 | G | A | downstream |                |
| LOC_Os02g56770 | Os02g0812700 | 2_34815466 | G | A | downstream |                |
| LOC_Os02g56770 | Os02g0812700 | 2_34815473 | C | T | downstream |                |
| LOC_Os02g56770 | Os02g0812700 | 2_34815473 | C | T | downstream |                |
| LOC_Os02g56770 | Os02g0812700 | 2_34815510 | C | T | downstream |                |
| LOC_Os02g56770 | Os02g0812700 | 2_34815510 | C | T | downstream |                |

|                |              |            |   |   |            |
|----------------|--------------|------------|---|---|------------|
| LOC_Os02g56770 | Os02g0812700 | 2_34815635 | G | A | downstream |
| LOC_Os02g56770 | Os02g0812700 | 2_34815635 | G | A | downstream |
| LOC_Os02g56770 | Os02g0812700 | 2_34815641 | G | A | downstream |
| LOC_Os02g56770 | Os02g0812700 | 2_34815641 | G | A | downstream |
| LOC_Os02g56770 | Os02g0812700 | 2_34815700 | C | T | downstream |
| LOC_Os02g56770 | Os02g0812700 | 2_34815700 | C | T | downstream |
| LOC_Os02g56770 | Os02g0812700 | 2_34815702 | C | T | downstream |
| LOC_Os02g56770 | Os02g0812700 | 2_34815702 | C | T | downstream |
| LOC_Os02g56770 | Os02g0812700 | 2_34815829 | A | C | downstream |
| LOC_Os02g56770 | Os02g0812700 | 2_34815829 | A | C | downstream |
| LOC_Os02g56770 | Os02g0812700 | 2_34815887 | C | T | downstream |
| LOC_Os02g56770 | Os02g0812700 | 2_34815887 | C | T | downstream |
| LOC_Os02g56770 | Os02g0812700 | 2_34815922 | T | C | downstream |
| LOC_Os02g56770 | Os02g0812700 | 2_34815922 | T | C | downstream |
| LOC_Os02g56810 | Os02g0813083 | 2_34819454 | A | G | exonic     |
| LOC_Os02g56810 | Os02g0813083 | 2_34819500 | G | A | exonic     |
| LOC_Os02g56820 | Os02g0813166 | 2_34824327 | A | G | upstream   |
| LOC_Os02g56820 | Os02g0813166 | 2_34824498 | C | T | upstream   |
| LOC_Os02g56820 | Os02g0813166 | 2_34824523 | A | C | upstream   |
| LOC_Os02g56820 | Os02g0813166 | 2_34825251 | T | C | exonic     |
| LOC_Os02g56820 | Os02g0813166 | 2_34825306 | T | C | intronic   |
| LOC_Os02g56820 | Os02g0813166 | 2_34825616 | T | C | exonic     |
| LOC_Os02g56820 | Os02g0813166 | 2_34825826 | C | T | downstream |
| LOC_Os02g56820 | Os02g0813166 | 2_34826342 | C | T | downstream |
| LOC_Os02g56820 | Os02g0813166 | 2_34826421 | T | C | downstream |
| LOC_Os02g56820 | Os02g0813166 | 2_34826441 | G | A | downstream |
| LOC_Os02g56820 | Os02g0813166 | 2_34826587 | C | G | downstream |
| LOC_Os02g56820 | Os02g0813166 | 2_34826697 | G | A | downstream |
| LOC_Os02g56820 | Os02g0813166 | 2_34826709 | G | A | downstream |
| LOC_Os02g56820 | Os02g0813166 | 2_34826750 | G | A | downstream |
| LOC_Os02g56840 | Os02g0813350 | 2_34833330 | C | T | upstream   |
| LOC_Os02g56840 | Os02g0813350 | 2_34833407 | G | T | upstream   |
| LOC_Os02g56840 | Os02g0813350 | 2_34833465 | G | A | upstream   |
| LOC_Os02g56840 | Os02g0813350 | 2_34833576 | A | G | upstream   |
| LOC_Os02g56840 | Os02g0813350 | 2_34833904 | A | C | upstream   |
| LOC_Os02g56840 | Os02g0813350 | 2_34833978 | T | A | exonic     |
| LOC_Os02g56840 | Os02g0813350 | 2_34834287 | C | A | intronic   |
| LOC_Os02g56840 | Os02g0813350 | 2_34834516 | G | A | intronic   |
| LOC_Os02g56840 | Os02g0813350 | 2_34835041 | C | T | intronic   |
| LOC_Os02g56840 | Os02g0813350 | 2_34835171 | T | C | intronic   |
| LOC_Os02g56840 | Os02g0813350 | 2_34835349 | A | G | exonic     |
| LOC_Os02g56840 | Os02g0813350 | 2_34835577 | A | G | exonic     |
| LOC_Os02g56840 | Os02g0813350 | 2_34835918 | G | C | UTR3       |
| LOC_Os02g56840 | Os02g0813350 | 2_34836065 | T | G | downstream |
| LOC_Os02g56840 | Os02g0813350 | 2_34836223 | T | C | downstream |
| LOC_Os02g56840 | Os02g0813350 | 2_34836376 | T | G | downstream |

|                |              |            |   |   |            |
|----------------|--------------|------------|---|---|------------|
| LOC_Os02g56840 | Os02g0813350 | 2_34836532 | G | A | downstream |
| LOC_Os02g56850 | Os02g0813500 | 2_34837496 | A | T | upstream   |
| LOC_Os02g56850 | Os02g0813500 | 2_34837505 | C | T | upstream   |
| LOC_Os02g56850 | Os02g0813500 | 2_34837517 | G | T | upstream   |
| LOC_Os02g56850 | Os02g0813500 | 2_34837542 | C | T | upstream   |
| LOC_Os02g56850 | Os02g0813500 | 2_34837837 | A | T | upstream   |
| LOC_Os02g56850 | Os02g0813500 | 2_34838060 | T | A | intronic   |
| LOC_Os02g56850 | Os02g0813500 | 2_34838498 | A | T | intronic   |
| LOC_Os02g56850 | Os02g0813500 | 2_34838732 | A | G | intronic   |
| LOC_Os02g56850 | Os02g0813500 | 2_34839061 | A | G | exonic     |
| LOC_Os02g56850 | Os02g0813500 | 2_34839350 | G | A | exonic     |
| LOC_Os02g56850 | Os02g0813500 | 2_34839995 | A | G | intronic   |
| LOC_Os02g56850 | Os02g0813500 | 2_34840068 | C | T | intronic   |
| LOC_Os02g56850 | Os02g0813500 | 2_34840116 | A | T | intronic   |
| LOC_Os02g56850 | Os02g0813500 | 2_34840365 | C | T | exonic     |
| LOC_Os02g56850 | Os02g0813500 | 2_34840409 | G | A | intronic   |
| LOC_Os02g56850 | Os02g0813500 | 2_34840436 | G | A | intronic   |
| LOC_Os02g56850 | Os02g0813500 | 2_34840874 | T | C | intronic   |
| LOC_Os02g56850 | Os02g0813500 | 2_34841193 | A | T | UTR3       |
| LOC_Os02g56850 | Os02g0813500 | 2_34841589 | T | C | UTR3       |
| LOC_Os02g56850 | Os02g0813500 | 2_34841873 | G | A | UTR3       |
| LOC_Os02g56850 | Os02g0813500 | 2_34842342 | G | A | intronic   |
| LOC_Os02g56850 | Os02g0813500 | 2_34842627 | G | C | intronic   |
| LOC_Os02g56850 | Os02g0813500 | 2_34842772 | T | C | intronic   |
| LOC_Os02g56850 | Os02g0813500 | 2_34842785 | T | G | intronic   |
| LOC_Os02g56850 | Os02g0813500 | 2_34842839 | A | T | exonic     |
| LOC_Os02g56850 | Os02g0813500 | 2_34843244 | C | T | exonic     |
| LOC_Os02g56850 | Os02g0813500 | 2_34843840 | A | G | UTR3       |
| LOC_Os02g56850 | Os02g0813500 | 2_34843857 | G | A | downstream |
| LOC_Os02g56850 | Os02g0813500 | 2_34844024 | A | G | downstream |
| LOC_Os02g56850 | Os02g0813500 | 2_34844196 | C | T | downstream |
| LOC_Os02g56850 | Os02g0813500 | 2_34844313 | T | A | downstream |
| LOC_Os02g56850 | Os02g0813500 | 2_34844468 | T | C | downstream |
| LOC_Os02g56850 | Os02g0813500 | 2_34844503 | T | C | downstream |
| LOC_Os02g56850 | Os02g0813500 | 2_34844618 | T | C | downstream |
| LOC_Os02g56850 | Os02g0813500 | 2_34844672 | G | A | downstream |
| LOC_Os02g56850 | Os02g0813500 | 2_34844717 | C | A | downstream |
| LOC_Os02g56850 | Os02g0813500 | 2_34844732 | T | C | downstream |
| LOC_Os02g56850 | Os02g0813500 | 2_34844764 | C | A | downstream |
| LOC_Os02g56860 | Os02g0813600 | 2_34852806 | A | T | upstream   |
| LOC_Os02g56860 | Os02g0813600 | 2_34852894 | A | G | upstream   |
| LOC_Os02g56860 | Os02g0813600 | 2_34854865 | C | T | exonic     |
| LOC_Os02g56860 | Os02g0813600 | 2_34855503 | T | G | downstream |
| LOC_Os02g56860 | Os02g0813600 | 2_34855770 | A | T | downstream |
| LOC_Os02g56860 | Os02g0813600 | 2_34855809 | A | T | downstream |
| LOC_Os02g56860 | Os02g0813600 | 2_34855911 | T | C | downstream |

|                |              |            |   |   |            |
|----------------|--------------|------------|---|---|------------|
| LOC_Os02g56860 | Os02g0813600 | 2_34856304 | G | T | downstream |
| LOC_Os02g56880 | Os02g0813800 | 2_34861672 | T | A | downstream |
| LOC_Os02g56880 | Os02g0813800 | 2_34861673 | G | A | downstream |
| LOC_Os02g56880 | Os02g0813800 | 2_34861820 | T | G | downstream |
| LOC_Os02g56880 | Os02g0813800 | 2_34861863 | A | C | downstream |
| LOC_Os02g56880 | Os02g0813800 | 2_34861893 | C | T | downstream |
| LOC_Os02g56880 | Os02g0813800 | 2_34861942 | T | C | downstream |
| LOC_Os02g56880 | Os02g0813800 | 2_34862095 | C | G | downstream |
| LOC_Os02g56880 | Os02g0813800 | 2_34862426 | A | T | downstream |
| LOC_Os02g56880 | Os02g0813800 | 2_34862506 | G | C | downstream |
| LOC_Os02g56880 | Os02g0813800 | 2_34862750 | C | A | UTR3       |
| LOC_Os02g56880 | Os02g0813800 | 2_34863003 | A | G | exonic     |
| LOC_Os02g56880 | Os02g0813800 | 2_34863079 | C | A | exonic     |
| LOC_Os02g56880 | Os02g0813800 | 2_34863080 | C | T | exonic     |
| LOC_Os02g56880 | Os02g0813800 | 2_34863140 | A | G | intronic   |
| LOC_Os02g56880 | Os02g0813800 | 2_34863184 | C | A | intronic   |
| LOC_Os02g56880 | Os02g0813800 | 2_34863257 | G | A | intronic   |
| LOC_Os02g56880 | Os02g0813800 | 2_34863358 | A | G | intronic   |
| LOC_Os02g56880 | Os02g0813800 | 2_34863679 | A | G | exonic     |
| LOC_Os02g56880 | Os02g0813800 | 2_34863872 | A | T | intronic   |
| LOC_Os02g56880 | Os02g0813800 | 2_34863896 | C | T | intronic   |
| LOC_Os02g56880 | Os02g0813800 | 2_34864169 | A | G | intronic   |
| LOC_Os02g56880 | Os02g0813800 | 2_34864537 | T | C | intronic   |
| LOC_Os02g56880 | Os02g0813800 | 2_34864753 | A | G | exonic     |
| LOC_Os02g56880 | Os02g0813800 | 2_34865004 | C | T | exonic     |
| LOC_Os02g56880 | Os02g0813800 | 2_34865070 | G | T | intronic   |
| LOC_Os02g56880 | Os02g0813800 | 2_34865229 | G | A | exonic     |
| LOC_Os02g56880 | Os02g0813800 | 2_34865303 | T | A | intronic   |
| LOC_Os02g56880 | Os02g0813800 | 2_34865405 | G | A | exonic     |
| LOC_Os02g56880 | Os02g0813800 | 2_34865408 | C | T | exonic     |
| LOC_Os02g56880 | Os02g0813800 | 2_34865728 | G | A | intronic   |
| LOC_Os02g56880 | Os02g0813800 | 2_34865754 | A | G | intronic   |
| LOC_Os02g56880 | Os02g0813800 | 2_34865828 | G | A | intronic   |
| LOC_Os02g56880 | Os02g0813800 | 2_34865841 | G | A | intronic   |
| LOC_Os02g56880 | Os02g0813800 | 2_34865874 | C | T | intronic   |
| LOC_Os02g56880 | Os02g0813800 | 2_34865901 | C | T | intronic   |
| LOC_Os02g56880 | Os02g0813800 | 2_34865997 | C | T | intronic   |
| LOC_Os02g56880 | Os02g0813800 | 2_34866128 | G | A | intronic   |
| LOC_Os02g56880 | Os02g0813800 | 2_34866247 | A | T | intronic   |
| LOC_Os02g56880 | Os02g0813800 | 2_34866266 | C | T | intronic   |
| LOC_Os02g56880 | Os02g0813800 | 2_34866341 | C | T | intronic   |
| LOC_Os02g56880 | Os02g0813800 | 2_34866347 | A | G | intronic   |
| LOC_Os02g56880 | Os02g0813800 | 2_34866356 | G | A | intronic   |
| LOC_Os02g56880 | Os02g0813800 | 2_34867369 | A | T | intronic   |
| LOC_Os02g56880 | Os02g0813800 | 2_34867390 | G | T | intronic   |
| LOC_Os02g56880 | Os02g0813800 | 2_34867425 | C | T | intronic   |

|                |              |            |   |   |          |
|----------------|--------------|------------|---|---|----------|
| LOC_Os02g56880 | Os02g0813800 | 2_34867468 | G | T | intronic |
| LOC_Os02g56880 | Os02g0813800 | 2_34867620 | A | T | intronic |
| LOC_Os02g56880 | Os02g0813800 | 2_34867815 | T | A | intronic |
| LOC_Os02g56880 | Os02g0813800 | 2_34867888 | C | T | intronic |
| LOC_Os02g56880 | Os02g0813800 | 2_34867899 | C | A | intronic |
| LOC_Os02g56880 | Os02g0813800 | 2_34868047 | C | T | intronic |
| LOC_Os02g56880 | Os02g0813800 | 2_34868096 | G | A | intronic |
| LOC_Os02g56880 | Os02g0813800 | 2_34868208 | A | G | intronic |
| LOC_Os02g56880 | Os02g0813800 | 2_34868315 | C | A | intronic |
| LOC_Os02g56880 | Os02g0813800 | 2_34868374 | G | A | intronic |
| LOC_Os02g56880 | Os02g0813800 | 2_34868426 | G | C | intronic |
| LOC_Os02g56880 | Os02g0813800 | 2_34868515 | T | G | exonic   |
| LOC_Os02g56880 | Os02g0813800 | 2_34868650 | C | G | intronic |
| LOC_Os02g56880 | Os02g0813800 | 2_34868830 | G | A | exonic   |
| LOC_Os02g56880 | Os02g0813800 | 2_34868840 | C | T | exonic   |
| LOC_Os02g56880 | Os02g0813800 | 2_34868962 | T | G | exonic   |
| LOC_Os02g56880 | Os02g0813800 | 2_34869249 | T | C | intronic |
| LOC_Os02g56880 | Os02g0813800 | 2_34869350 | C | T | intronic |
| LOC_Os02g56880 | Os02g0813800 | 2_34869364 | T | C | intronic |
| LOC_Os02g56880 | Os02g0813800 | 2_34869563 | G | A | exonic   |
| LOC_Os02g56880 | Os02g0813800 | 2_34869731 | C | A | exonic   |
| LOC_Os02g56880 | Os02g0813800 | 2_34869912 | C | A | exonic   |
| LOC_Os02g56880 | Os02g0813800 | 2_34870221 | C | G | intronic |
| LOC_Os02g56880 | Os02g0813800 | 2_34870300 | C | T | exonic   |
| LOC_Os02g56880 | Os02g0813800 | 2_34870584 | C | G | intronic |
| LOC_Os02g56880 | Os02g0813800 | 2_34871196 | A | G | intronic |
| LOC_Os02g56880 | Os02g0813800 | 2_34871221 | C | T | intronic |
| LOC_Os02g56880 | Os02g0813800 | 2_34871249 | A | G | intronic |
| LOC_Os02g56880 | Os02g0813800 | 2_34871250 | G | A | intronic |
| LOC_Os02g56880 | Os02g0813800 | 2_34871313 | C | T | intronic |
| LOC_Os02g56880 | Os02g0813800 | 2_34871416 | G | A | intronic |
| LOC_Os02g56880 | Os02g0813800 | 2_34871518 | G | A | intronic |
| LOC_Os02g56880 | Os02g0813800 | 2_34871704 | G | T | intronic |
| LOC_Os02g56880 | Os02g0813800 | 2_34871836 | G | T | intronic |
| LOC_Os02g56880 | Os02g0813800 | 2_34871915 | G | A | intronic |
| LOC_Os02g56880 | Os02g0813800 | 2_34872177 | C | A | intronic |
| LOC_Os02g56880 | Os02g0813800 | 2_34872351 | A | C | intronic |
| LOC_Os02g56880 | Os02g0813800 | 2_34872392 | C | T | intronic |
| LOC_Os02g56880 | Os02g0813800 | 2_34872501 | G | A | intronic |
| LOC_Os02g56880 | Os02g0813800 | 2_34872535 | G | A | intronic |
| LOC_Os02g56880 | Os02g0813800 | 2_34872655 | G | A | UTR5     |
| LOC_Os02g56880 | Os02g0813800 | 2_34872807 | A | G | UTR5     |
| LOC_Os02g56880 | Os02g0813800 | 2_34873023 | T | G | upstream |
| LOC_Os02g56880 | Os02g0813800 | 2_34873041 | C | G | upstream |
| LOC_Os02g56880 | Os02g0813800 | 2_34873739 | C | T | upstream |
| LOC_Os02g56880 | Os02g0813800 | 2_34873742 | G | A | upstream |



|                |              |            |   |   |            |
|----------------|--------------|------------|---|---|------------|
| LOC_Os02g56880 | Os02g0813800 | 2_34873777 | A | G | upstream   |
| LOC_Os02g56900 | Os02g0814000 | 2_34879196 | C | T | downstream |
| LOC_Os02g56900 | Os02g0814000 | 2_34879419 | A | G | downstream |
| LOC_Os02g56900 | Os02g0814000 | 2_34879596 | A | G | UTR3       |
| LOC_Os02g56900 | Os02g0814000 | 2_34879604 | T | C | UTR3       |
| LOC_Os02g56900 | Os02g0814000 | 2_34879606 | G | C | UTR3       |
| LOC_Os02g56900 | Os02g0814000 | 2_34879642 | A | G | UTR3       |
| LOC_Os02g56900 | Os02g0814000 | 2_34879846 | G | A | UTR3       |
| LOC_Os02g56900 | Os02g0814000 | 2_34879881 | C | T | UTR3       |
| LOC_Os02g56900 | Os02g0814000 | 2_34880568 | A | G | intronic   |
| LOC_Os02g56900 | Os02g0814000 | 2_34880971 | G | A | UTR5       |
| LOC_Os02g56900 | Os02g0814000 | 2_34881146 | G | C | upstream   |
| LOC_Os02g56900 | Os02g0814000 | 2_34881157 | C | T | upstream   |
| LOC_Os02g56900 | Os02g0814000 | 2_34881195 | G | A | upstream   |
| LOC_Os02g56900 | Os02g0814000 | 2_34881441 | A | G | upstream   |
| LOC_Os02g56900 | Os02g0814000 | 2_34881535 | G | A | upstream   |
| LOC_Os02g56900 | Os02g0814000 | 2_34881541 | T | C | upstream   |
| LOC_Os02g56900 | Os02g0814000 | 2_34881554 | A | G | upstream   |
| LOC_Os02g56900 | Os02g0814000 | 2_34881578 | C | T | upstream   |
| LOC_Os02g56900 | Os02g0814000 | 2_34881585 | G | A | upstream   |
| LOC_Os02g56910 | Os02g0814100 | 2_34882408 | A | G | downstream |
| LOC_Os02g56910 | Os02g0814100 | 2_34882663 | A | T | downstream |
| LOC_Os02g56910 | Os02g0814100 | 2_34882670 | C | A | downstream |
| LOC_Os02g56910 | Os02g0814100 | 2_34883164 | A | G | UTR3       |
| LOC_Os02g56910 | Os02g0814100 | 2_34883864 | T | C | UTR3       |
| LOC_Os02g56910 | Os02g0814100 | 2_34883879 | G | A | UTR3       |
| LOC_Os02g56910 | Os02g0814100 | 2_34884125 | C | T | intronic   |
| LOC_Os02g56910 | Os02g0814100 | 2_34885261 | G | A | exonic     |
| LOC_Os02g56910 | Os02g0814100 | 2_34885309 | T | A | exonic     |
| LOC_Os02g56910 | Os02g0814100 | 2_34885743 | C | T | upstream   |
| LOC_Os02g56910 | Os02g0814100 | 2_34885825 | G | A | upstream   |
| LOC_Os02g56910 | Os02g0814100 | 2_34885911 | C | T | upstream   |
| LOC_Os02g56910 | Os02g0814100 | 2_34885979 | A | G | upstream   |
| LOC_Os02g56910 | Os02g0814100 | 2_34886114 | G | A | upstream   |
| LOC_Os02g56910 | Os02g0814100 | 2_34886432 | G | A | upstream   |
| LOC_Os02g56920 | Os02g0814200 | 2_34888702 | A | T | downstream |
| LOC_Os02g56920 | Os02g0814200 | 2_34888711 | G | A | downstream |
| LOC_Os02g56920 | Os02g0814200 | 2_34888746 | A | G | downstream |
| LOC_Os02g56920 | Os02g0814200 | 2_34888777 | C | T | downstream |
| LOC_Os02g56920 | Os02g0814200 | 2_34888802 | T | C | downstream |
| LOC_Os02g56920 | Os02g0814200 | 2_34888811 | T | C | downstream |
| LOC_Os02g56920 | Os02g0814200 | 2_34888898 | T | C | downstream |
| LOC_Os02g56920 | Os02g0814200 | 2_34888994 | G | A | downstream |
| LOC_Os02g56920 | Os02g0814200 | 2_34889017 | A | G | downstream |
| LOC_Os02g56920 | Os02g0814200 | 2_34889018 | G | T | downstream |
| LOC_Os02g56920 | Os02g0814200 | 2_34889026 | T | C | downstream |

|                |              |            |   |   |            |
|----------------|--------------|------------|---|---|------------|
| LOC_Os02g56920 | Os02g0814200 | 2_34889057 | C | T | downstream |
| LOC_Os02g56920 | Os02g0814200 | 2_34889071 | T | A | downstream |
| LOC_Os02g56920 | Os02g0814200 | 2_34889126 | C | T | downstream |
| LOC_Os02g56920 | Os02g0814200 | 2_34889128 | C | T | downstream |
| LOC_Os02g56920 | Os02g0814200 | 2_34889269 | C | T | downstream |
| LOC_Os02g56920 | Os02g0814200 | 2_34889417 | C | T | downstream |
| LOC_Os02g56920 | Os02g0814200 | 2_34889429 | G | A | downstream |
| LOC_Os02g56920 | Os02g0814200 | 2_34889460 | C | A | downstream |
| LOC_Os02g56920 | Os02g0814200 | 2_34889619 | G | A | downstream |
| LOC_Os02g56920 | Os02g0814200 | 2_34890123 | G | A | intronic   |
| LOC_Os02g56920 | Os02g0814200 | 2_34890145 | C | T | intronic   |
| LOC_Os02g56920 | Os02g0814200 | 2_34890393 | A | G | intronic   |
| LOC_Os02g56920 | Os02g0814200 | 2_34890763 | G | A | exonic     |
| LOC_Os02g56920 | Os02g0814200 | 2_34891312 | C | T | intronic   |
| LOC_Os02g56920 | Os02g0814200 | 2_34891437 | C | T | intronic   |
| LOC_Os02g56920 | Os02g0814200 | 2_34891457 | G | A | intronic   |
| LOC_Os02g56920 | Os02g0814200 | 2_34891534 | G | A | intronic   |
| LOC_Os02g56920 | Os02g0814200 | 2_34891596 | G | A | intronic   |
| LOC_Os02g56920 | Os02g0814200 | 2_34892656 | G | A | exonic     |
| LOC_Os02g56920 | Os02g0814200 | 2_34893339 | T | C | intronic   |
| LOC_Os02g56920 | Os02g0814200 | 2_34893344 | G | A | intronic   |
| LOC_Os02g56920 | Os02g0814200 | 2_34893485 | A | C | exonic     |
| LOC_Os02g56920 | Os02g0814200 | 2_34893738 | T | G | exonic     |
| LOC_Os02g56920 | Os02g0814200 | 2_34893909 | C | G | upstream   |
| LOC_Os02g56920 | Os02g0814200 | 2_34893924 | C | A | upstream   |
| LOC_Os02g56920 | Os02g0814200 | 2_34894120 | T | C | upstream   |
| LOC_Os02g56920 | Os02g0814200 | 2_34894397 | T | C | upstream   |
| LOC_Os02g56920 | Os02g0814200 | 2_34894441 | A | C | upstream   |
| LOC_Os02g56920 | Os02g0814200 | 2_34894475 | A | G | upstream   |
| LOC_Os02g56920 | Os02g0814200 | 2_34894547 | A | G | upstream   |
| LOC_Os02g56920 | Os02g0814200 | 2_34894644 | T | C | upstream   |
| LOC_Os02g56920 | Os02g0814200 | 2_34894662 | T | C | upstream   |
| LOC_Os02g56920 | Os02g0814200 | 2_34894794 | G | T | upstream   |
| LOC_Os02g56960 | Os02g0814700 | 2_34912429 | G | T | intronic   |
| LOC_Os02g56960 | Os02g0814700 | 2_34912592 | A | G | intronic   |
| LOC_Os02g56960 | Os02g0814700 | 2_34912977 | C | T | intronic   |
| LOC_Os02g56960 | Os02g0814700 | 2_34913411 | G | C | UTR3       |
| LOC_Os02g56960 | Os02g0814700 | 2_34913436 | A | G | UTR3       |
| LOC_Os02g56970 | Os02g0814800 | 2_34913741 | A | C | UTR5       |
| LOC_Os02g56970 | Os02g0814800 | 2_34914583 | G | T | intronic   |
| LOC_Os02g56970 | Os02g0814800 | 2_34914674 | C | T | intronic   |
| LOC_Os02g56970 | Os02g0814800 | 2_34914699 | A | G | intronic   |
| LOC_Os02g56970 | Os02g0814800 | 2_34914839 | A | C | exonic     |
| LOC_Os02g56980 | Os02g0814900 | 2_34916538 | T | C | exonic     |
| LOC_Os02g56980 | Os02g0814900 | 2_34916620 | G | A | exonic     |
| LOC_Os02g56990 | Os02g0815000 | 2_34918769 | T | C | intronic   |

|                |              |            |   |   |          |
|----------------|--------------|------------|---|---|----------|
| LOC_Os02g56990 | Os02g0815000 | 2_34919103 | G | A | intronic |
| LOC_Os02g56990 | Os02g0815000 | 2_34919113 | G | C | intronic |
| LOC_Os02g56990 | Os02g0815000 | 2_34919216 | A | G | intronic |
| LOC_Os02g56990 | Os02g0815000 | 2_34919467 | G | T | intronic |
| LOC_Os02g56990 | Os02g0815000 | 2_34919721 | G | A | UTR3     |
| LOC_Os02g57010 | Os02g0815200 | 2_34923193 | T | C | intronic |
| LOC_Os02g57010 | Os02g0815200 | 2_34923463 | C | T | intronic |
| LOC_Os02g57040 | Os02g0815500 | 2_34930470 | A | G | intronic |
| LOC_Os02g57040 | Os02g0815500 | 2_34931185 | G | A | intronic |
| LOC_Os02g57040 | Os02g0815500 | 2_34931234 | T | C | intronic |
| LOC_Os02g57040 | Os02g0815500 | 2_34931353 | T | C | intronic |
| LOC_Os02g57040 | Os02g0815500 | 2_34932025 | C | A | intronic |
| LOC_Os02g57040 | Os02g0815500 | 2_34933329 | A | C | intronic |
| LOC_Os02g57040 | Os02g0815500 | 2_34933339 | C | T | intronic |
| LOC_Os02g57040 | Os02g0815500 | 2_34933471 | C | T | intronic |
| LOC_Os02g57040 | Os02g0815500 | 2_34933663 | A | T | intronic |
| LOC_Os02g57040 | Os02g0815500 | 2_34933900 | G | A | UTR3     |
| LOC_Os02g57050 | Os02g0815600 | 2_34934829 | A | G | intronic |
| LOC_Os02g57050 | Os02g0815600 | 2_34934889 | C | A | intronic |
| LOC_Os02g57050 | Os02g0815600 | 2_34935044 | T | C | intronic |
| LOC_Os02g57050 | Os02g0815600 | 2_34935194 | G | A | intronic |
| LOC_Os02g57050 | Os02g0815600 | 2_34935226 | A | G | intronic |
| LOC_Os02g57050 | Os02g0815600 | 2_34935248 | A | T | intronic |
| LOC_Os02g57050 | Os02g0815600 | 2_34935733 | C | G | exonic   |
| LOC_Os02g57050 | Os02g0815600 | 2_34935771 | G | A | exonic   |
| LOC_Os02g57050 | Os02g0815600 | 2_34936153 | G | A | exonic   |
| LOC_Os02g57050 | Os02g0815600 | 2_34936209 | G | A | exonic   |
| LOC_Os02g57050 | Os02g0815600 | 2_34936329 | C | T | exonic   |
| LOC_Os02g57060 | Os02g0815700 | 2_34937546 | C | T | intronic |
| LOC_Os02g57060 | Os02g0815700 | 2_34938131 | G | A | exonic   |
| LOC_Os02g57060 | Os02g0815700 | 2_34938215 | C | T | exonic   |
| LOC_Os02g57060 | Os02g0815700 | 2_34938460 | C | T | exonic   |
| LOC_Os02g57060 | Os02g0815700 | 2_34938470 | A | G | exonic   |
| LOC_Os02g57060 | Os02g0815700 | 2_34938638 | C | A | intronic |
| LOC_Os02g57060 | Os02g0815700 | 2_34938739 | G | T | intronic |
| LOC_Os02g57060 | Os02g0815700 | 2_34939293 | C | T | exonic   |
| LOC_Os02g57060 | Os02g0815700 | 2_34939509 | C | T | intronic |
| LOC_Os02g57060 | Os02g0815700 | 2_34939632 | G | T | intronic |
| LOC_Os02g57060 | Os02g0815700 | 2_34941190 | A | T | UTR3     |
| LOC_Os02g57060 | Os02g0815700 | 2_34941191 | T | A | UTR3     |
| LOC_Os02g57060 | Os02g0815700 | 2_34941211 | C | G | UTR3     |
| LOC_Os02g57060 | Os02g0815700 | 2_34941245 | T | G | UTR3     |
| LOC_Os02g57060 | Os02g0815700 | 2_34941267 | A | G | UTR3     |
| LOC_Os02g57070 | Os02g0815800 | 2_34942095 | G | A | exonic   |
| LOC_Os02g57070 | Os02g0815800 | 2_34942994 | T | C | intronic |
| LOC_Os02g57070 | Os02g0815800 | 2_34943062 | G | T | intronic |

|                       |                     |            |   |   |          |
|-----------------------|---------------------|------------|---|---|----------|
| <i>LOC_Os02g57070</i> | <i>Os02g0815800</i> | 2_34943106 | T | A | intronic |
| <i>LOC_Os02g57070</i> | <i>Os02g0815800</i> | 2_34943107 | A | T | intronic |
| <i>LOC_Os02g57070</i> | <i>Os02g0815800</i> | 2_34943172 | T | C | intronic |
| <i>LOC_Os02g57070</i> | <i>Os02g0815800</i> | 2_34943400 | C | T | intronic |
| <i>LOC_Os02g57070</i> | <i>Os02g0815800</i> | 2_34943466 | C | T | intronic |
| <i>LOC_Os02g57070</i> | <i>Os02g0815800</i> | 2_34943572 | C | T | intronic |
| <i>LOC_Os02g57070</i> | <i>Os02g0815800</i> | 2_34943576 | G | A | intronic |
| <i>LOC_Os02g57070</i> | <i>Os02g0815800</i> | 2_34943606 | C | T | intronic |
| <i>LOC_Os02g57080</i> | <i>Os02g0815900</i> | 2_34946013 | C | T | exonic   |
| <i>LOC_Os02g57080</i> | <i>Os02g0815900</i> | 2_34947002 | G | A | exonic   |
| <i>LOC_Os02g57080</i> | <i>Os02g0815900</i> | 2_34948707 | G | A | exonic   |
| <i>LOC_Os02g57080</i> | <i>Os02g0815900</i> | 2_34952741 | G | A | upstream |
| <i>LOC_Os02g57080</i> | <i>Os02g0815900</i> | 2_34952859 | T | A | upstream |
| <i>LOC_Os02g57080</i> | <i>Os02g0815900</i> | 2_34952953 | C | T | upstream |
| <i>LOC_Os02g57080</i> | <i>Os02g0815900</i> | 2_34952987 | C | T | upstream |

---

**Table S7.** Candidate gene annotation in the LD region 20.3-20.6 Mb associated with FLL and FLR

| Number | Gene ID             | MSU ID                | Position (bp)     | Annotation                                                  |
|--------|---------------------|-----------------------|-------------------|-------------------------------------------------------------|
| 1      | <i>Os05g0416400</i> | <i>LOC_Os05g34380</i> | 20379467-20381121 | cytochrome P450                                             |
| 2      | <i>Os05g0416500</i> | <i>LOC_Os05g34390</i> | 20384039-20390785 | protein kinase domain containing protein                    |
| 3      | <i>Os05g0417000</i> | <i>LOC_Os05g34450</i> | 20417514-20418507 | DUF260 domain containing protein                            |
| 4      | <i>Os05g0417100</i> | <i>LOC_Os05g34460</i> | 20433366-20437932 | OsDegp7 - Putative Deg protease homologue                   |
| 5      | <i>Os05g0417800</i> | <i>LOC_Os05g34520</i> | 20461728-20467798 | ulp1 protease family protein                                |
| 6      | <i>Os05g0417900</i> | <i>LOC_Os05g34530</i> | 20471167-20471460 | auxin-inducible protein                                     |
| 7      | <i>Os05g0418000</i> | <i>LOC_Os05g34540</i> | 20477376-20483599 | rab GDP dissociation inhibitor alpha                        |
| 8      | <i>Os05g0418100</i> | <i>LOC_Os05g34550</i> | 20484964-20490119 | MLO domain containing protein                               |
| 9      | <i>Os05g0418500</i> | <i>LOC_Os05g34570</i> | 20498729-20500703 | pentatricopeptide                                           |
| 10     | <i>Os05g0418800</i> | <i>LOC_Os05g34600</i> | 20516577-20519072 | no apical meristem protein                                  |
| 11     | <i>Os05g0419000</i> | <i>LOC_Os05g34630</i> | 20536382-20539797 | hydrolase, alpha/beta fold family domain containing protein |
| 12     | <i>Os05g0419100</i> | <i>LOC_Os05g34640</i> | 20542371-20546991 | PHD finger protein                                          |
| 13     | <i>Os05g0419200</i> | <i>LOC_Os05g34650</i> | 20548402-20553184 | DUF647 domain containing protein                            |

**Table S8.** SNP information in 20.3-20.6 Mb associated with FLL and FLR

| MSU ID                | Gene ID             | SNP Location | Reference | Alternative | Region     | Variation type |
|-----------------------|---------------------|--------------|-----------|-------------|------------|----------------|
| <i>LOC_Os05g34380</i> | <i>Os05g0416400</i> | 5_20378488   | T         | C           | upstream   |                |
| <i>LOC_Os05g34380</i> | <i>Os05g0416400</i> | 5_20379974   | T         | A           | intronic   |                |
| <i>LOC_Os05g34380</i> | <i>Os05g0416400</i> | 5_20380333   | T         | C           | exonic     | nonsynonymous  |
| <i>LOC_Os05g34380</i> | <i>Os05g0416400</i> | 5_20380446   | A         | G           | exonic     | synonymous     |
| <i>LOC_Os05g34380</i> | <i>Os05g0416400</i> | 5_20380460   | A         | G           | exonic     | nonsynonymous  |
| <i>LOC_Os05g34380</i> | <i>Os05g0416400</i> | 5_20380862   | C         | T           | exonic     | nonsynonymous  |
| <i>LOC_Os05g34380</i> | <i>Os05g0416400</i> | 5_20381034   | C         | T           | exonic     | synonymous     |
| <i>LOC_Os05g34380</i> | <i>Os05g0416400</i> | 5_20381117   | C         | T           | exonic     | nonsynonymous  |
| <i>LOC_Os05g34380</i> | <i>Os05g0416400</i> | 5_20381221   | C         | T           | downstream |                |
| <i>LOC_Os05g34380</i> | <i>Os05g0416400</i> | 5_20381243   | T         | C           | downstream |                |
| <i>LOC_Os05g34380</i> | <i>Os05g0416400</i> | 5_20381264   | A         | G           | downstream |                |
| <i>LOC_Os05g34380</i> | <i>Os05g0416400</i> | 5_20381567   | C         | T           | downstream |                |
| <i>LOC_Os05g34380</i> | <i>Os05g0416400</i> | 5_20381621   | T         | C           | downstream |                |
| <i>LOC_Os05g34380</i> | <i>Os05g0416400</i> | 5_20381631   | C         | T           | downstream |                |
| <i>LOC_Os05g34380</i> | <i>Os05g0416400</i> | 5_20381919   | G         | A           | downstream |                |
| <i>LOC_Os05g34380</i> | <i>Os05g0416400</i> | 5_20381943   | G         | A           | downstream |                |
| <i>LOC_Os05g34380</i> | <i>Os05g0416400</i> | 5_20382082   | C         | G           | downstream |                |
| <i>LOC_Os05g34450</i> | <i>Os05g0417000</i> | 5_20418989   | G         | A           | upstream   |                |
| <i>LOC_Os05g34460</i> | <i>Os05g0417100</i> | 5_20432746   | G         | A           | upstream   |                |
| <i>LOC_Os05g34460</i> | <i>Os05g0417100</i> | 5_20433009   | T         | C           | upstream   |                |
| <i>LOC_Os05g34460</i> | <i>Os05g0417100</i> | 5_20433030   | A         | G           | upstream   |                |
| <i>LOC_Os05g34460</i> | <i>Os05g0417100</i> | 5_20434078   | T         | G           | intronic   |                |
| <i>LOC_Os05g34460</i> | <i>Os05g0417100</i> | 5_20434133   | A         | G           | intronic   |                |
| <i>LOC_Os05g34460</i> | <i>Os05g0417100</i> | 5_20434181   | T         | G           | intronic   |                |
| <i>LOC_Os05g34460</i> | <i>Os05g0417100</i> | 5_20434346   | C         | T           | intronic   |                |
| <i>LOC_Os05g34460</i> | <i>Os05g0417100</i> | 5_20434409   | A         | G           | exonic     |                |
| <i>LOC_Os05g34460</i> | <i>Os05g0417100</i> | 5_20434800   | T         | C           | intronic   |                |
| <i>LOC_Os05g34460</i> | <i>Os05g0417100</i> | 5_20434873   | A         | G           | intronic   |                |
| <i>LOC_Os05g34460</i> | <i>Os05g0417100</i> | 5_20435032   | C         | T           | intronic   |                |
| <i>LOC_Os05g34460</i> | <i>Os05g0417100</i> | 5_20435048   | A         | T           | intronic   |                |
| <i>LOC_Os05g34460</i> | <i>Os05g0417100</i> | 5_20435196   | A         | G           | intronic   |                |
| <i>LOC_Os05g34460</i> | <i>Os05g0417100</i> | 5_20435364   | T         | C           | intronic   |                |
| <i>LOC_Os05g34460</i> | <i>Os05g0417100</i> | 5_20435690   | C         | T           | intronic   |                |
| <i>LOC_Os05g34460</i> | <i>Os05g0417100</i> | 5_20436036   | G         | A           | intronic   |                |
| <i>LOC_Os05g34460</i> | <i>Os05g0417100</i> | 5_20436358   | A         | G           | intronic   |                |
| <i>LOC_Os05g34460</i> | <i>Os05g0417100</i> | 5_20436385   | C         | T           | intronic   |                |
| <i>LOC_Os05g34460</i> | <i>Os05g0417100</i> | 5_20436587   | C         | T           | intronic   |                |
| <i>LOC_Os05g34460</i> | <i>Os05g0417100</i> | 5_20436630   | C         | T           | intronic   |                |
| <i>LOC_Os05g34460</i> | <i>Os05g0417100</i> | 5_20436684   | A         | C           | intronic   |                |
| <i>LOC_Os05g34460</i> | <i>Os05g0417100</i> | 5_20436871   | C         | G           | exonic     |                |
| <i>LOC_Os05g34460</i> | <i>Os05g0417100</i> | 5_20437009   | C         | T           | intronic   |                |
| <i>LOC_Os05g34460</i> | <i>Os05g0417100</i> | 5_20437119   | A         | T           | intronic   |                |
| <i>LOC_Os05g34460</i> | <i>Os05g0417100</i> | 5_20437214   | A         | G           | exonic     |                |
| <i>LOC_Os05g34460</i> | <i>Os05g0417100</i> | 5_20437498   | C         | T           | UTR3       |                |
| <i>LOC_Os05g34460</i> | <i>Os05g0417100</i> | 5_20437508   | C         | T           | UTR3       |                |
| <i>LOC_Os05g34460</i> | <i>Os05g0417100</i> | 5_20437782   | A         | G           | UTR3       |                |

|                |              |            |   |   |            |
|----------------|--------------|------------|---|---|------------|
| LOC_Os05g34530 | Os05g0417900 | 5_20470248 | G | A | downstream |
| LOC_Os05g34530 | Os05g0417900 | 5_20470271 | A | T | downstream |
| LOC_Os05g34530 | Os05g0417900 | 5_20470272 | G | A | downstream |
| LOC_Os05g34530 | Os05g0417900 | 5_20470353 | G | A | downstream |
| LOC_Os05g34530 | Os05g0417900 | 5_20470376 | T | C | downstream |
| LOC_Os05g34530 | Os05g0417900 | 5_20470534 | A | C | downstream |
| LOC_Os05g34530 | Os05g0417900 | 5_20470703 | A | G | downstream |
| LOC_Os05g34530 | Os05g0417900 | 5_20470781 | A | G | downstream |
| LOC_Os05g34530 | Os05g0417900 | 5_20470960 | A | C | downstream |
| LOC_Os05g34530 | Os05g0417900 | 5_20471019 | G | C | downstream |
| LOC_Os05g34530 | Os05g0417900 | 5_20471094 | G | A | downstream |
| LOC_Os05g34530 | Os05g0417900 | 5_20471839 | C | A | upstream   |
| LOC_Os05g34530 | Os05g0417900 | 5_20471977 | A | G | upstream   |
| LOC_Os05g34530 | Os05g0417900 | 5_20471999 | G | T | upstream   |
| LOC_Os05g34530 | Os05g0417900 | 5_20472254 | T | A | upstream   |
| LOC_Os05g34530 | Os05g0417900 | 5_20472297 | G | A | upstream   |
| LOC_Os05g34530 | Os05g0417900 | 5_20472420 | G | A | upstream   |
| LOC_Os05g34540 | Os05g0418000 | 5_20476474 | C | T | upstream   |
| LOC_Os05g34540 | Os05g0418000 | 5_20476558 | G | A | upstream   |
| LOC_Os05g34540 | Os05g0418000 | 5_20476570 | C | T | upstream   |
| LOC_Os05g34540 | Os05g0418000 | 5_20476671 | G | A | upstream   |
| LOC_Os05g34540 | Os05g0418000 | 5_20476875 | C | T | upstream   |
| LOC_Os05g34540 | Os05g0418000 | 5_20476898 | G | A | upstream   |
| LOC_Os05g34540 | Os05g0418000 | 5_20476905 | C | T | upstream   |
| LOC_Os05g34540 | Os05g0418000 | 5_20477930 | T | G | intronic   |
| LOC_Os05g34540 | Os05g0418000 | 5_20479623 | C | T | intronic   |
| LOC_Os05g34540 | Os05g0418000 | 5_20479665 | T | A | intronic   |
| LOC_Os05g34540 | Os05g0418000 | 5_20479779 | A | G | intronic   |
| LOC_Os05g34540 | Os05g0418000 | 5_20480235 | C | T | exonic     |
| LOC_Os05g34540 | Os05g0418000 | 5_20480238 | T | C | exonic     |
| LOC_Os05g34540 | Os05g0418000 | 5_20480502 | G | T | intronic   |
| LOC_Os05g34540 | Os05g0418000 | 5_20480595 | T | A | intronic   |
| LOC_Os05g34540 | Os05g0418000 | 5_20480710 | T | C | intronic   |
| LOC_Os05g34540 | Os05g0418000 | 5_20480754 | G | C | intronic   |
| LOC_Os05g34540 | Os05g0418000 | 5_20481773 | C | T | exonic     |
| LOC_Os05g34540 | Os05g0418000 | 5_20481830 | G | A | intronic   |
| LOC_Os05g34540 | Os05g0418000 | 5_20481895 | A | G | exonic     |
| LOC_Os05g34540 | Os05g0418000 | 5_20481991 | A | G | intronic   |
| LOC_Os05g34540 | Os05g0418000 | 5_20482305 | T | C | intronic   |
| LOC_Os05g34540 | Os05g0418000 | 5_20482502 | T | G | intronic   |
| LOC_Os05g34540 | Os05g0418000 | 5_20483013 | A | T | intronic   |
| LOC_Os05g34540 | Os05g0418000 | 5_20483165 | C | T | intronic   |
| LOC_Os05g34540 | Os05g0418000 | 5_20483442 | T | C | UTR3       |
| LOC_Os05g34540 | Os05g0418000 | 5_20483757 | C | T | downstream |
| LOC_Os05g34540 | Os05g0418000 | 5_20483844 | A | T | downstream |
| LOC_Os05g34540 | Os05g0418000 | 5_20483957 | T | C | downstream |
| LOC_Os05g34550 | Os05g0418100 | 5_20484701 | G | A | downstream |
| LOC_Os05g34550 | Os05g0418100 | 5_20484738 | A | G | downstream |

|                |              |            |   |   |            |               |
|----------------|--------------|------------|---|---|------------|---------------|
| LOC_Os05g34550 | Os05g0418100 | 5_20485258 | A | G | UTR3       |               |
| LOC_Os05g34550 | Os05g0418100 | 5_20485366 | T | A | UTR3       |               |
| LOC_Os05g34550 | Os05g0418100 | 5_20485378 | C | T | UTR3       |               |
| LOC_Os05g34550 | Os05g0418100 | 5_20485399 | C | T | UTR3       |               |
| LOC_Os05g34550 | Os05g0418100 | 5_20485926 | T | C | UTR3       |               |
| LOC_Os05g34550 | Os05g0418100 | 5_20485982 | G | A | intronic   |               |
| LOC_Os05g34550 | Os05g0418100 | 5_20486258 | G | T | intronic   |               |
| LOC_Os05g34550 | Os05g0418100 | 5_20486522 | G | T | intronic   |               |
| LOC_Os05g34550 | Os05g0418100 | 5_20486572 | T | C | intronic   |               |
| LOC_Os05g34550 | Os05g0418100 | 5_20486861 | A | G | intronic   |               |
| LOC_Os05g34550 | Os05g0418100 | 5_20487255 | G | A | intronic   |               |
| LOC_Os05g34550 | Os05g0418100 | 5_20487629 | G | T | intronic   |               |
| LOC_Os05g34550 | Os05g0418100 | 5_20487962 | G | A | UTR3       |               |
| LOC_Os05g34550 | Os05g0418100 | 5_20488369 | T | G | UTR3       |               |
| LOC_Os05g34550 | Os05g0418100 | 5_20488405 | G | A | UTR3       |               |
| LOC_Os05g34550 | Os05g0418100 | 5_20488515 | A | C | UTR3       |               |
| LOC_Os05g34550 | Os05g0418100 | 5_20488692 | T | C | UTR3       |               |
| LOC_Os05g34550 | Os05g0418100 | 5_20488939 | C | A | exonic     |               |
| LOC_Os05g34550 | Os05g0418100 | 5_20489533 | T | C | intronic   |               |
| LOC_Os05g34550 | Os05g0418100 | 5_20489581 | C | T | intronic   |               |
| LOC_Os05g34550 | Os05g0418100 | 5_20489924 | A | T | intronic   |               |
| LOC_Os05g34550 | Os05g0418100 | 5_20490138 | G | C | upstream   |               |
| LOC_Os05g34550 | Os05g0418100 | 5_20490805 | T | C | upstream   |               |
| LOC_Os05g34570 | Os05g0418500 | 5_20497932 | T | C | downstream |               |
| LOC_Os05g34570 | Os05g0418500 | 5_20498064 | G | A | downstream |               |
| LOC_Os05g34570 | Os05g0418500 | 5_20498449 | A | G | downstream |               |
| LOC_Os05g34570 | Os05g0418500 | 5_20498475 | G | C | downstream |               |
| LOC_Os05g34570 | Os05g0418500 | 5_20498835 | G | C | UTR3       |               |
| LOC_Os05g34570 | Os05g0418500 | 5_20499975 | A | G | exonic     |               |
| LOC_Os05g34600 | Os05g0418800 | 5_20515645 | A | G | downstream |               |
| LOC_Os05g34600 | Os05g0418800 | 5_20515662 | A | G | downstream |               |
| LOC_Os05g34600 | Os05g0418800 | 5_20515680 | A | T | downstream |               |
| LOC_Os05g34600 | Os05g0418800 | 5_20515733 | C | T | downstream |               |
| LOC_Os05g34600 | Os05g0418800 | 5_20515734 | C | T | downstream |               |
| LOC_Os05g34600 | Os05g0418800 | 5_20515763 | C | T | downstream |               |
| LOC_Os05g34600 | Os05g0418800 | 5_20515859 | G | A | downstream |               |
| LOC_Os05g34600 | Os05g0418800 | 5_20516161 | T | C | downstream |               |
| LOC_Os05g34600 | Os05g0418800 | 5_20516261 | T | A | downstream |               |
| LOC_Os05g34600 | Os05g0418800 | 5_20516318 | A | G | downstream |               |
| LOC_Os05g34600 | Os05g0418800 | 5_20516436 | C | T | downstream |               |
| LOC_Os05g34600 | Os05g0418800 | 5_20517660 | T | C | intronic   |               |
| LOC_Os05g34600 | Os05g0418800 | 5_20518209 | A | G | intronic   |               |
| LOC_Os05g34600 | Os05g0418800 | 5_20518215 | T | C | intronic   |               |
| LOC_Os05g34600 | Os05g0418800 | 5_20518230 | A | G | intronic   |               |
| LOC_Os05g34600 | Os05g0418800 | 5_20518499 | T | A | exonic     | nonsynonymous |
| LOC_Os05g34630 | Os05g0419000 | 5_20535489 | C | T | downstream |               |
| LOC_Os05g34630 | Os05g0419000 | 5_20535628 | T | C | downstream |               |
| LOC_Os05g34630 | Os05g0419000 | 5_20535643 | C | T | downstream |               |



|                |              |            |   |   |            |
|----------------|--------------|------------|---|---|------------|
| LOC_Os05g34630 | Os05g0419000 | 5_20535695 | T | C | downstream |
| LOC_Os05g34630 | Os05g0419000 | 5_20535718 | A | G | downstream |
| LOC_Os05g34630 | Os05g0419000 | 5_20535757 | C | T | downstream |
| LOC_Os05g34630 | Os05g0419000 | 5_20535796 | A | C | downstream |
| LOC_Os05g34630 | Os05g0419000 | 5_20535840 | C | T | downstream |
| LOC_Os05g34630 | Os05g0419000 | 5_20536241 | A | T | downstream |
| LOC_Os05g34630 | Os05g0419000 | 5_20536530 | T | G | UTR3       |
| LOC_Os05g34630 | Os05g0419000 | 5_20536631 | T | C | UTR3       |
| LOC_Os05g34630 | Os05g0419000 | 5_20536638 | A | T | UTR3       |
| LOC_Os05g34630 | Os05g0419000 | 5_20536881 | G | T | exonic     |
| LOC_Os05g34630 | Os05g0419000 | 5_20537310 | G | A | intronic   |
| LOC_Os05g34630 | Os05g0419000 | 5_20537615 | A | G | intronic   |
| LOC_Os05g34630 | Os05g0419000 | 5_20537617 | C | T | intronic   |
| LOC_Os05g34630 | Os05g0419000 | 5_20537627 | C | T | intronic   |
| LOC_Os05g34630 | Os05g0419000 | 5_20537644 | C | T | intronic   |
| LOC_Os05g34630 | Os05g0419000 | 5_20537708 | A | G | intronic   |
| LOC_Os05g34630 | Os05g0419000 | 5_20537717 | G | A | intronic   |
| LOC_Os05g34630 | Os05g0419000 | 5_20537761 | A | G | intronic   |
| LOC_Os05g34630 | Os05g0419000 | 5_20537780 | G | A | intronic   |
| LOC_Os05g34630 | Os05g0419000 | 5_20537808 | G | A | intronic   |
| LOC_Os05g34630 | Os05g0419000 | 5_20538467 | T | C | intronic   |
| LOC_Os05g34630 | Os05g0419000 | 5_20538655 | C | T | intronic   |
| LOC_Os05g34630 | Os05g0419000 | 5_20538798 | C | A | intronic   |
| LOC_Os05g34630 | Os05g0419000 | 5_20538919 | A | G | intronic   |
| LOC_Os05g34630 | Os05g0419000 | 5_20540056 | T | A | upstream   |
| LOC_Os05g34630 | Os05g0419000 | 5_20540167 | G | A | upstream   |
| LOC_Os05g34630 | Os05g0419000 | 5_20540174 | T | C | upstream   |
| LOC_Os05g34630 | Os05g0419000 | 5_20540294 | A | C | upstream   |
| LOC_Os05g34630 | Os05g0419000 | 5_20540312 | T | C | upstream   |
| LOC_Os05g34630 | Os05g0419000 | 5_20540329 | A | C | upstream   |
| LOC_Os05g34630 | Os05g0419000 | 5_20540361 | A | G | upstream   |
| LOC_Os05g34630 | Os05g0419000 | 5_20540420 | A | C | upstream   |
| LOC_Os05g34630 | Os05g0419000 | 5_20540492 | T | C | upstream   |
| LOC_Os05g34630 | Os05g0419000 | 5_20540503 | A | T | upstream   |
| LOC_Os05g34630 | Os05g0419000 | 5_20540767 | T | C | upstream   |
| LOC_Os05g34630 | Os05g0419000 | 5_20540793 | C | T | upstream   |
| LOC_Os05g34640 | Os05g0419100 | 5_20543169 | T | G | intronic   |
| LOC_Os05g34640 | Os05g0419100 | 5_20543411 | C | T | intronic   |
| LOC_Os05g34640 | Os05g0419100 | 5_20544908 | C | T | intronic   |
| LOC_Os05g34640 | Os05g0419100 | 5_20544958 | C | T | intronic   |
| LOC_Os05g34640 | Os05g0419100 | 5_20544980 | T | C | intronic   |
| LOC_Os05g34640 | Os05g0419100 | 5_20545683 | A | C | intronic   |
| LOC_Os05g34640 | Os05g0419100 | 5_20545769 | A | G | intronic   |
| LOC_Os05g34640 | Os05g0419100 | 5_20545799 | G | A | intronic   |
| LOC_Os05g34640 | Os05g0419100 | 5_20546172 | A | G | intronic   |
| LOC_Os05g34640 | Os05g0419100 | 5_20546268 | C | T | intronic   |
| LOC_Os05g34640 | Os05g0419100 | 5_20546460 | G | A | intronic   |
| LOC_Os05g34640 | Os05g0419100 | 5_20547229 | A | G | downstream |

|                       |                     |            |   |   |            |
|-----------------------|---------------------|------------|---|---|------------|
| <i>LOC_Os05g34640</i> | <i>Os05g0419100</i> | 5_20547347 | G | T | downstream |
| <i>LOC_Os05g34640</i> | <i>Os05g0419100</i> | 5_20547372 | G | A | downstream |
| <i>LOC_Os05g34650</i> | <i>Os05g0419200</i> | 5_20548111 | G | A | downstream |
| <i>LOC_Os05g34650</i> | <i>Os05g0419200</i> | 5_20548132 | T | C | downstream |
| <i>LOC_Os05g34650</i> | <i>Os05g0419200</i> | 5_20548361 | A | T | downstream |
| <i>LOC_Os05g34650</i> | <i>Os05g0419200</i> | 5_20548606 | A | G | UTR3       |
| <i>LOC_Os05g34650</i> | <i>Os05g0419200</i> | 5_20548680 | C | G | UTR3       |
| <i>LOC_Os05g34650</i> | <i>Os05g0419200</i> | 5_20548693 | C | T | intronic   |
| <i>LOC_Os05g34650</i> | <i>Os05g0419200</i> | 5_20548891 | C | T | UTR3       |
| <i>LOC_Os05g34650</i> | <i>Os05g0419200</i> | 5_20548903 | A | T | UTR3       |
| <i>LOC_Os05g34650</i> | <i>Os05g0419200</i> | 5_20549117 | G | C | intronic   |
| <i>LOC_Os05g34650</i> | <i>Os05g0419200</i> | 5_20549464 | T | C | exonic     |
| <i>LOC_Os05g34650</i> | <i>Os05g0419200</i> | 5_20551103 | T | C | intronic   |
| <i>LOC_Os05g34650</i> | <i>Os05g0419200</i> | 5_20551255 | A | C | intronic   |
| <i>LOC_Os05g34650</i> | <i>Os05g0419200</i> | 5_20551787 | A | T | intronic   |
| <i>LOC_Os05g34650</i> | <i>Os05g0419200</i> | 5_20551884 | A | G | intronic   |
| <i>LOC_Os05g34650</i> | <i>Os05g0419200</i> | 5_20552442 | T | A | intronic   |
| <i>LOC_Os05g34650</i> | <i>Os05g0419200</i> | 5_20553973 | T | A | upstream   |
| <i>LOC_Os05g34650</i> | <i>Os05g0419200</i> | 5_20554039 | T | C | upstream   |
| <i>LOC_Os05g34650</i> | <i>Os05g0419200</i> | 5_20554133 | A | G | upstream   |
| <i>LOC_Os05g34650</i> | <i>Os05g0419200</i> | 5_20554176 | A | G | upstream   |

---

**Table S9.** Haplotype analysis of three candidate genes in 3K rice genome.

| Gene                  | Haplot<br>ype | SNPs                         | Total<br>number<br>of<br>accession<br>s | The accession number of different<br>subgroups  | Flag Leaf<br>Length(cm) | Flag Leaf<br>Width(cm) |
|-----------------------|---------------|------------------------------|-----------------------------------------|-------------------------------------------------|-------------------------|------------------------|
| <i>LOC_Os02g56760</i> | Hap1          | AACGGCCAAC TGATAGTGT TATCCAA | 868                                     | Aus: 69; Bas: 5; GJ: 121; XI: 652;<br>admix: 21 | 32.518                  | 1.433                  |
|                       | Hap2          | GGCGGCCAACTGACGGCGATATCCAA   | 419                                     | Aus: 1; GJ: 7; XI: 402; admix: 9                | 31.616                  | 1.414                  |
|                       | Hap3          | GGAGGCCAACTGATAGTATCCCTTCA   | 232                                     | Aus: 1; Bas: 1; GJ: 229; admix: 1               | 29.368                  | 1.534                  |
|                       | Hap4          | GGAGGCCAACTGATAGTATCCTTTCA   | 201                                     | Aus: 2; GJ: 197; admix: 2                       | 28.748                  | 1.543                  |
|                       | Hap5          | AACGGCCAAC TGATATTGT TATCCAA | 198                                     | GJ: 6; XI: 189; admix: 3                        | 28.964                  | 1.445                  |
|                       | Hap6          | AACGGCCAAC GTTAGTGT TATCCAA  | 132                                     | Aus: 78; Bas: 11; XI: 28; admix: 15             | 31.953                  | 1.337                  |
| <i>LOC_Os05g34380</i> | Hap1          | GCTGGTCACAATGCGCGGGTTC       | 646                                     | Aus: 9; GJ: 3; XI: 623; admix: 11               | 31.750                  | 1.403                  |
|                       | Hap2          | CCGGGTCAAACCACGTGAACCT       | 398                                     | Aus: 5; Bas: 46; GJ: 324; XI: 7;<br>admix: 16   | 28.566                  | 1.474                  |
|                       | Hap3          | GCTGGTCACAATGCACGGGTTC       | 150                                     | GJ: 146; admix: 4                               | 30.502                  | 1.675                  |
|                       | Hap4          | GCTGRTCACAATGCGCGGGTTC       | 150                                     | Aus: 2; GJ: 1; XI: 145; admix: 2                | 31.222                  | 1.418                  |
|                       | Hap5          | -----ATGCGCGGGTTC            | 123                                     | XI: 119; admix: 4                               | 32.488                  | 1.401                  |
|                       | Hap6          | CCGGGTCAAACCACGTGAACCC       | 88                                      | Bas: 16; GJ: 68; XI: 1; admix: 3                | 27.475                  | 1.358                  |
| <i>LOC_Os05g34600</i> | Hap1          | CCCCCGCAGGAG                 | 606                                     | Aus: 10; GJ: 6; XI: 576; admix: 14              | 31.438                  | 1.393                  |
|                       | Hap2          | CC-----AGGAG                 | 153                                     | Aus: 2; GJ: 2; XI: 148; admix: 1                | 30.155                  | 1.381                  |
|                       | Hap3          | CCCCC--AGGAG                 | 151                                     | Aus: 3; XI: 145; admix: 3                       | 31.386                  | 1.399                  |

|      |              |     |                                  |        |       |     |              |
|------|--------------|-----|----------------------------------|--------|-------|-----|--------------|
| Hap4 | TCCCTGCAGGTG | 117 | GJ: 101; XI: 14; admix: 2        | 31.357 | 1.655 | XI: | <i>Oryza</i> |
| Hap5 | TCCCCCCCAGTG | 106 | Bas: 8; GJ: 68; XI: 24; admix: 6 | 29.179 | 1.466 |     |              |
| Hap6 | CCCC---AGGAG | 104 | XI: 101; admix: 3                | 31.843 | 1.402 |     |              |

*sativa* L. indica; GJ: *Oryza sativa* L. japonica; admix: admixed subpopulation

**Table S10.** Gene haplotype distribution of 173 accessions

| No. | Accession        | FLL                   |      |       |                       |       | FLW                   |       |      |      |
|-----|------------------|-----------------------|------|-------|-----------------------|-------|-----------------------|-------|------|------|
|     |                  | <i>LOC_Os05g34380</i> |      |       | <i>LOC_Os05g34600</i> |       | <i>LOC_Os02g56760</i> |       |      |      |
|     |                  | HapA                  | HapB | HapC  | HapA                  | HapB  | HapA                  | HapB  | HapC | HapD |
|     |                  | 3.17                  | 0.96 | -3.56 | 2.96                  | -1.78 | 0.12                  | -0.11 | 0.08 | 0.09 |
| 1   | Longjing 22      |                       | ✓    |       |                       | ▲     |                       |       | ✓    |      |
| 2   | Longjing 28      |                       | ✓    |       |                       | ▲     |                       | ▲     |      |      |
| 3   | Longjing 27      |                       | ✓    |       |                       | ▲     |                       | ▲     |      |      |
| 4   | 24248            | ✓                     |      |       | ✓                     |       |                       | ▲     |      |      |
| 5   | Tijin            | ✓                     |      |       | ✓                     |       |                       |       |      | ✓    |
| 6   | Zhongguo 91      |                       |      | ▲     |                       | ▲     |                       |       | ✓    |      |
| 7   | Kangbingyueguang |                       | ✓    |       |                       | ▲     |                       | ▲     |      |      |
| 8   | Sihao 4385       |                       |      | ▲     |                       | ▲     |                       |       |      | ✓    |
| 9   | Nannongjing 1R   | ✓                     |      |       | ✓                     |       | ✓                     |       |      |      |
| 10  | Hongmangshajing  | ✓                     |      |       |                       | ▲     | ✓                     |       |      |      |
| 11  | Wanhuangdao      |                       | ✓    |       |                       | ▲     |                       | ▲     |      |      |
| 12  | Xudao 3hao       |                       |      | ▲     |                       | ▲     |                       | ▲     |      |      |
| 13  | Youzhiyueguang   |                       | ✓    |       |                       | ▲     |                       | ▲     |      |      |
| 14  | Yuedao 68        | ✓                     |      |       | ✓                     |       | ✓                     |       |      |      |
| 15  | Longdao 8hao     | ✓                     |      |       | ✓                     |       |                       | ▲     |      |      |
| 16  | Longdao 6hao     | ✓                     |      |       | ✓                     |       |                       | ▲     |      |      |
| 17  | Qiutianxiaoding  |                       |      | ▲     |                       | ▲     |                       | ▲     |      |      |
| 18  | Zhenghan 2hao    | ✓                     |      |       |                       | ▲     |                       | ▲     |      |      |
| 19  | Xiangjing 9407   | ✓                     |      |       | ✓                     |       |                       |       |      | ✓    |
| 20  | Nongxiang 21     | ✓                     |      |       | ✓                     |       |                       |       | ✓    |      |
| 21  | Fengyouwan 8hao  | ✓                     |      |       |                       | ▲     |                       |       | ✓    |      |
| 22  | Xiangwanxian 17  | ✓                     |      |       | ✓                     |       |                       | ▲     |      |      |

|    |                   |   |   |   |   |   |   |   |   |
|----|-------------------|---|---|---|---|---|---|---|---|
| 23 | Yuedao 37         | ✓ |   |   | ✓ |   | ✓ |   |   |
| 24 | Sujing 353        |   | ✓ |   |   | ▲ |   | ▲ |   |
| 25 | Zhen9424          |   |   | ▲ |   | ▲ |   | ▲ |   |
| 26 | Baikenuo          | ✓ |   |   | ✓ |   |   |   | ✓ |
| 27 | Diantun502xuanzao | ✓ |   |   | ✓ |   |   |   | ✓ |
| 28 | Yuedao 41         | ✓ |   |   | ✓ |   | ✓ |   |   |
| 29 | Longnuo 3hao      |   | ✓ |   |   | ▲ |   | ▲ |   |
| 30 | Mudanjiang 28     |   | ✓ |   |   | ▲ |   | ▲ |   |
| 31 | Yujing 6hao       |   |   | ▲ |   | ▲ |   | ▲ |   |
| 32 | Shengdao808       |   |   | ▲ |   | ▲ |   | ▲ |   |
| 33 | Yuedao 32         | ✓ |   |   | ✓ |   | ✓ |   |   |
| 34 | Yuedao 107        | ✓ |   |   | ✓ |   | ✓ |   |   |
| 35 | Yuedao 61         | ✓ |   |   | ✓ |   | ✓ |   |   |
| 36 | Yuedao 50         | ✓ |   |   | ✓ |   |   |   | ✓ |
| 37 | Yuedao 109        | ✓ |   |   | ✓ |   |   |   | ✓ |
| 38 | Yuedao 62         | ✓ |   |   | ✓ |   | ✓ |   |   |
| 39 | Yuedao 66         | ✓ |   |   | ✓ |   |   |   | ✓ |
| 40 | Hongnong 5hao     |   |   | ▲ |   | ▲ |   | ▲ |   |
| 41 | Suyunuo           |   |   | ▲ |   | ▲ |   | ▲ |   |
| 42 | Shenlenuo         |   |   | ▲ |   | ▲ |   | ▲ |   |
| 43 | Hongjiaozhan      | ✓ |   |   |   | ▲ | ✓ |   |   |
| 44 | Wanjingnuo        |   |   | ▲ |   | ▲ |   | ▲ |   |
| 45 | Nongxiang26       | ✓ |   |   | ✓ |   |   |   | ✓ |
| 46 | Yuedao 9          | ✓ |   |   | ✓ |   | ✓ |   |   |
| 47 | M1004             | ✓ |   |   | ✓ |   |   | ▲ |   |
| 48 | Nongxiang 25      | ✓ |   |   | ✓ |   |   |   | ✓ |
| 49 | Longjing 20       |   |   | ▲ |   | ▲ |   | ▲ |   |

|    |                       |   |   |   |   |   |   |
|----|-----------------------|---|---|---|---|---|---|
| 50 | Xiangchuanwuxinbaimi  | ✓ |   | ✓ |   | ✓ |   |
| 51 | Jindao 1007           |   | ▲ |   | ▲ |   | ✓ |
| 52 | Zaijinjing            |   | ▲ |   | ▲ | ▲ |   |
| 53 | Malaihong             | ✓ |   |   | ▲ | ✓ |   |
| 54 | Nannongjing3786       |   | ▲ |   | ▲ |   | ✓ |
| 55 | Wuyunjing 8hao        |   | ▲ |   | ▲ |   | ✓ |
| 56 | Yuzhenxiang           | ✓ |   | ✓ |   | ▲ |   |
| 57 | Yuedao24(LCV18)       |   | ▲ |   | ▲ | ✓ |   |
| 58 | Yuedao 3              | ✓ |   | ✓ |   | ✓ |   |
| 59 | Yuedao 43             | ✓ |   | ✓ |   | ✓ |   |
| 60 | Yuedao 48             | ✓ |   | ✓ |   |   | ✓ |
| 61 | Yuedao 49             | ✓ |   | ✓ |   |   | ✓ |
| 62 | Yuedao 13             | ✓ |   | ✓ |   | ✓ |   |
| 63 | Wumangyedao           |   | ▲ |   | ▲ | ▲ |   |
| 64 | Haobuqia              | ✓ |   | ✓ |   | ✓ |   |
| 65 | Yuedao 22             | ✓ |   | ✓ |   |   | ✓ |
| 66 | Dongzhengwuyunjing 21 |   | ▲ |   | ▲ |   | ✓ |
| 67 | Yandao 8hao           |   | ▲ |   | ▲ | ▲ |   |
| 68 | Huaidao 11hao         |   | ▲ |   | ▲ |   | ✓ |
| 69 | Nannongjing 004       |   | ▲ |   | ▲ | ▲ |   |
| 70 | Zhongzuo 93           |   | ▲ |   | ▲ | ▲ |   |
| 71 | Xudao 5hao            |   | ▲ |   | ▲ | ▲ |   |
| 72 | Digludao              |   | ▲ |   | ▲ | ▲ |   |
| 73 | Huaidao 8hao          |   | ▲ |   | ▲ |   | ✓ |
| 74 | Dongzheng 1640        |   | ▲ |   | ▲ |   | ✓ |
| 75 | Yanjing 8hao          |   | ▲ |   | ▲ | ▲ |   |
| 76 | Huifeng 2             |   | ▲ |   | ▲ | ▲ |   |

|     |                 |   |   |   |   |  |   |   |   |
|-----|-----------------|---|---|---|---|--|---|---|---|
| 77  | Yandao 9hao     |   | ▲ |   | ▲ |  | ▲ |   |   |
| 78  | Lianjing 4hao   |   | ▲ |   | ▲ |  |   |   | ✓ |
| 79  | Huifeng 1       |   | ▲ |   | ▲ |  | ▲ |   |   |
| 80  | Sihao 4280      |   | ▲ |   | ▲ |  | ▲ |   |   |
| 81  | Sihao 4330      |   | ▲ |   | ▲ |  | ▲ |   |   |
| 82  | Sihao 4259      | ✓ |   |   | ▲ |  | ▲ |   |   |
| 83  | Zhengdao 18     |   | ▲ |   | ▲ |  | ▲ |   |   |
| 84  | Jingnuo 330     |   | ▲ |   | ▲ |  |   |   | ✓ |
| 85  | Zhongjing 212   |   | ▲ |   | ▲ |  |   |   | ✓ |
| 86  | Wuyunjing 21hao |   | ▲ |   | ▲ |  | ▲ |   |   |
| 87  | Huajing 6hao    |   | ▲ |   | ▲ |  | ▲ |   |   |
| 88  | Yangfujing 8hao |   | ▲ |   | ▲ |  | ▲ |   |   |
| 89  | Zhendao 99      |   | ▲ |   | ▲ |  | ▲ |   |   |
| 90  | Ningjing 2hao   |   | ▲ |   | ▲ |  |   |   | ✓ |
| 91  | Huajing 5hao    | ✓ |   |   | ▲ |  |   |   | ✓ |
| 92  | Zhongjing 9677  | ✓ |   |   | ▲ |  | ▲ |   |   |
| 93  | Yangfujing 7hao |   | ▲ |   | ▲ |  | ▲ |   |   |
| 94  | Yuedao 12       | ✓ |   | ✓ |   |  |   | ✓ |   |
| 95  | Jianongnuo 2hao |   | ▲ |   | ▲ |  | ▲ |   |   |
| 96  | Xudao 4hao      |   | ▲ |   | ▲ |  | ▲ |   |   |
| 97  | Sihao 4040      |   | ▲ |   | ▲ |  | ▲ |   |   |
| 98  | Yanjing 9hao    |   | ▲ |   | ▲ |  |   |   | ✓ |
| 99  | Sihao 4081      | ✓ |   | ✓ |   |  | ▲ |   |   |
| 100 | Sihao 4041      |   | ▲ |   | ▲ |  |   |   | ✓ |
| 101 | Sihao 4031      |   | ▲ |   | ▲ |  | ▲ |   |   |
| 102 | Wandao 68       |   | ▲ |   | ▲ |  |   |   | ✓ |
| 103 | Wuxiang99-8     |   | ▲ |   | ▲ |  |   |   | ✓ |



|     |                  |   |   |   |   |   |   |   |   |
|-----|------------------|---|---|---|---|---|---|---|---|
| 104 | Zhongjing 131    |   |   | ▲ |   | ▲ |   | ▲ |   |
| 105 | Ningjinghui 260  |   |   | ▲ |   | ▲ |   |   | ✓ |
| 106 | Ningjinghui 237  |   |   | ▲ |   | ▲ |   | ▲ |   |
| 107 | Wunuoyihao       |   |   | ▲ |   | ▲ |   | ▲ |   |
| 108 | Sihao 4029       |   |   | ▲ |   | ▲ |   |   | ✓ |
| 109 | Ludao            |   |   | ▲ |   | ▲ |   | ▲ |   |
| 110 | Wanqu 429bp      |   |   | ▲ |   | ▲ |   |   | ✓ |
| 111 | Yangfujing 4901  |   |   | ▲ |   | ▲ |   |   | ✓ |
| 112 | Yandao 6hao      | ✓ |   |   | ✓ |   |   | ▲ |   |
| 113 | Cbao             | ✓ |   |   | ✓ |   |   | ▲ |   |
| 114 | Zhengdao 10hao   | ✓ |   |   | ✓ |   | ✓ |   |   |
| 115 | Baoxintaihuqing  | ✓ |   |   |   | ▲ |   | ▲ |   |
| 116 | Huaidao 9hao     | ✓ |   |   | ✓ |   |   | ▲ |   |
| 117 | Xiaobaidao       |   |   | ▲ |   | ▲ |   | ▲ |   |
| 118 | Yaxuenuo         |   | ✓ |   |   | ▲ |   | ▲ |   |
| 119 | Yangguang 200    |   |   | ▲ |   | ▲ |   | ▲ |   |
| 120 | Zaoshirihuangdao |   | ✓ |   |   | ▲ |   | ▲ |   |
| 121 | Luohanhuang      |   |   | ▲ |   | ▲ |   | ▲ |   |
| 122 | Xudao2hao        | ✓ |   |   | ✓ |   |   | ▲ |   |
| 123 | Xudao9201B       |   |   | ▲ |   | ▲ |   | ▲ |   |
| 124 | Ebusinuodao      |   |   | ▲ |   | ▲ |   | ▲ |   |
| 125 | Yueguang         |   | ✓ |   |   | ▲ |   | ▲ |   |
| 126 | Yimuhu           | ✓ |   |   |   | ▲ | ✓ |   |   |
| 127 | Qingkong         |   | ✓ |   |   | ▲ |   | ▲ |   |
| 128 | RT61             |   | ✓ |   |   | ▲ |   | ▲ |   |
| 129 | IL38             |   | ✓ |   |   | ▲ |   | ▲ |   |
| 130 | Liuyezhan        | ✓ |   |   | ✓ |   | ✓ |   |   |

|     |                        |   |   |   |   |   |   |   |
|-----|------------------------|---|---|---|---|---|---|---|
| 131 | Zaoxian 14             | ✓ |   | ✓ |   | ✓ |   |   |
| 132 | Xu91075                | ✓ |   | ✓ |   | ✓ |   |   |
| 133 | Xudao 25-7             |   | ▲ |   | ▲ |   |   | ✓ |
| 134 | Qing 7                 | ✓ |   | ✓ |   |   | ✓ |   |
| 135 | Sihao 4141             |   | ▲ |   | ▲ |   |   | ✓ |
| 136 | SH189                  |   | ✓ |   | ▲ |   |   |   |
| 137 | SHN1                   | ✓ |   | ✓ |   | ✓ |   |   |
| 138 | Suwujing               | ✓ |   | ✓ |   | ✓ |   |   |
| 139 | 9522B                  |   | ▲ |   | ▲ |   |   | ✓ |
| 140 | 863B                   |   | ▲ |   | ▲ |   | ▲ |   |
| 141 | Biaojiyongzijing       |   | ▲ |   | ▲ |   | ▲ |   |
| 142 | Zigu                   | ✓ |   |   | ▲ | ✓ |   |   |
| 143 | Jiangpuchangliheimidao |   | ▲ |   | ▲ |   |   | ✓ |
| 144 | A7444                  |   | ▲ |   | ▲ |   | ▲ |   |
| 145 | Xiepihuang             |   | ▲ |   | ▲ |   | ▲ |   |
| 146 | Shengtangqing          | ✓ |   | ✓ |   |   |   | ✓ |
| 147 | Chuan 6xian            | ✓ |   |   | ▲ |   | ✓ |   |
| 148 | Chuan 5xian            | ✓ |   |   | ▲ |   | ✓ |   |
| 149 | Shufeng 101            | ✓ |   | ✓ |   | ✓ |   |   |
| 150 | Chengnongshuijing      | ✓ |   | ✓ |   |   |   | ✓ |
| 151 | Xiangxiandao 10hao     | ✓ |   | ✓ |   |   |   | ✓ |
| 152 | II-32B                 | ✓ |   | ✓ |   |   | ✓ |   |
| 153 | Chenwan 3hao           | ✓ |   | ✓ |   | ✓ |   |   |
| 154 | Xiangaizao 10hao       | ✓ |   | ✓ |   |   | ✓ |   |
| 155 | Yuetai B               | ✓ |   | ✓ |   | ✓ |   |   |
| 156 | Qimiaoxiang 2hao       | ✓ |   | ✓ |   |   |   | ✓ |
| 157 | Shengyou 2hao          | ✓ |   | ✓ |   |   | ✓ |   |

|     |                  |   |   |   |   |   |   |   |   |
|-----|------------------|---|---|---|---|---|---|---|---|
| 158 | Guichao 2hao     | ✓ |   | ✓ |   | ✓ |   |   |   |
| 159 | Minghui63        | ✓ |   | ✓ |   |   |   | ✓ |   |
| 160 | LongtepuB        | ✓ |   |   | ▲ | ✓ |   |   |   |
| 161 | Hainanxian R     | ✓ |   | ✓ |   |   |   | ✓ |   |
| 162 | Zajiaohaigu      | ✓ |   | ✓ |   |   |   |   | ✓ |
| 163 | Nuohangu         |   | ▲ |   | ▲ |   | ▲ |   |   |
| 164 | Lincangwazuhangu |   | ▲ |   | ▲ |   | ▲ |   |   |
| 165 | Yuedao 55        | ✓ |   | ✓ |   | ✓ |   |   |   |
| 166 | Yuedao 108       | ✓ |   | ✓ |   | ✓ |   |   |   |
| 167 | IR112            | ✓ |   | ✓ |   |   |   |   | ✓ |
| 168 | IR64             | ✓ |   | ✓ |   | ✓ |   |   |   |
| 169 | Arias            | ✓ |   | ✓ |   |   |   | ✓ |   |
| 170 | CAMOR            | ✓ |   |   | ▲ |   | ▲ |   |   |
| 171 | Gendjah Gempol   | ✓ |   |   | ▲ |   | ▲ |   |   |
| 172 | BULUH BAWU       | ✓ |   |   | ▲ |   | ▲ |   |   |
| 173 | Shengdao 14      |   | ▲ |   | ▲ |   |   |   | ✓ |

---

✓ indicates the favorable haplotypes; ▲ indicates the non-favorable haplotypes

## Figures

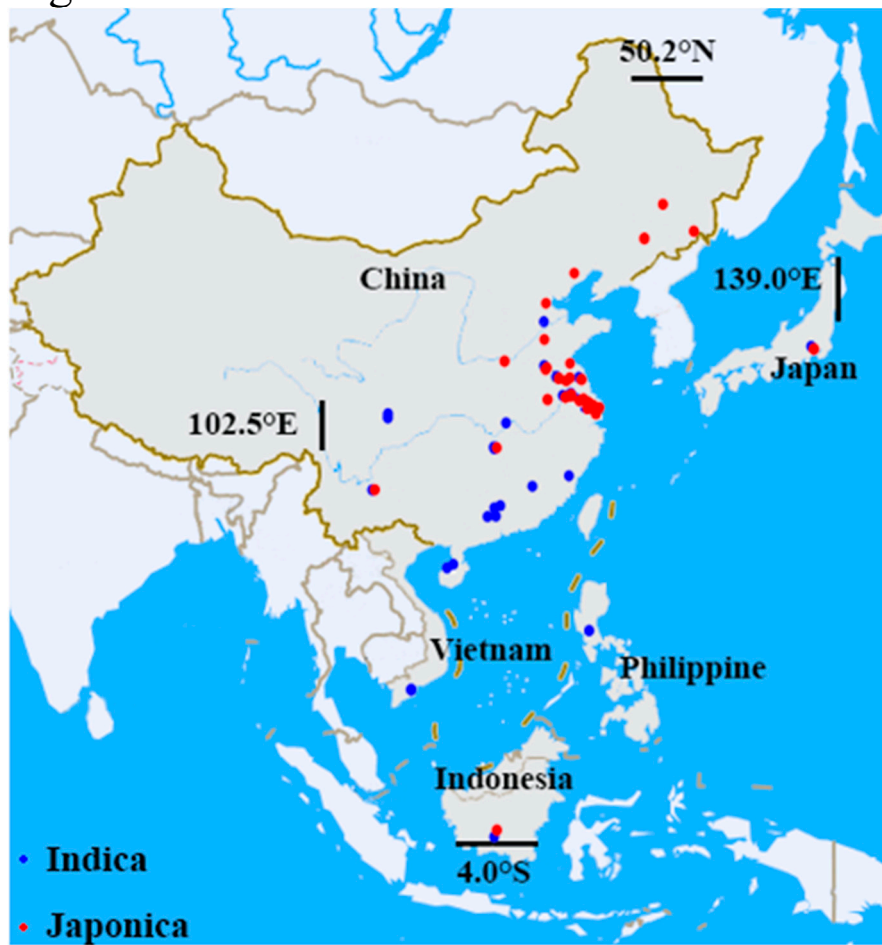

Figure S1. Geographic distribution map of 173 rice accessions used in this study.

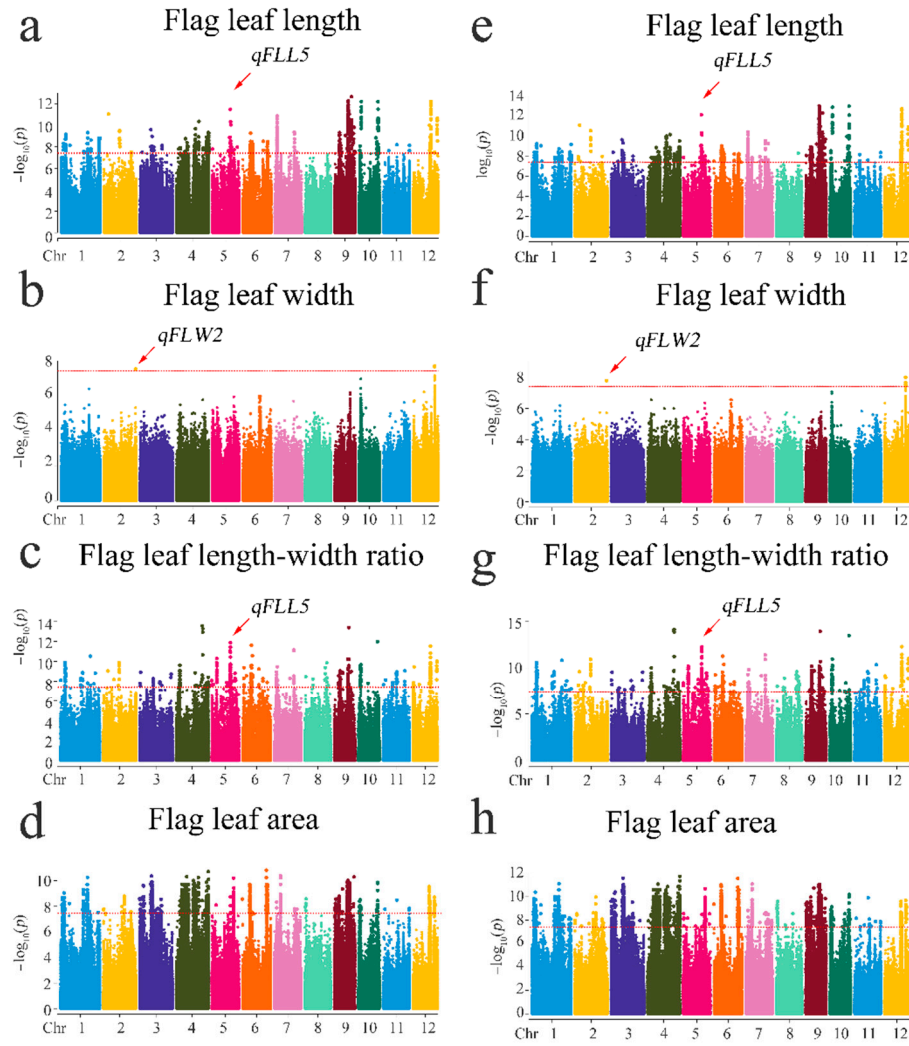

**Figure S2.** Manhattan plots of genome-wide association studies for the FLL, FLW, FLR and FLA with GLM. (a) Manhattan plot for FLL in 2019; (b) Manhattan plot for FLW in 2019; (c) Manhattan plot for FLR in 2019; (d) Manhattan plot for FLA in 2019; (e) Manhattan plot for FLL in 2020; (f) Manhattan plot for FLW in 2020; (g) Manhattan plot for the FLR in 2020; (h) Manhattan plot for the FLA in 2020.
